# Supplementary material
Source: PubMed Central journal article supplement (PMC6736719)
Supplement: NIHMS1039161-supplement-Supp_info.pdf [file NIHMS1039161-supplement-Supp_info.pdf]

Supporting Information for “Robust semiparametric  
gene-environment interaction analysis using sparse boosting” by  
Mengyun Wu and Shuangge Ma

This file contains additional simulation and data analysis results.

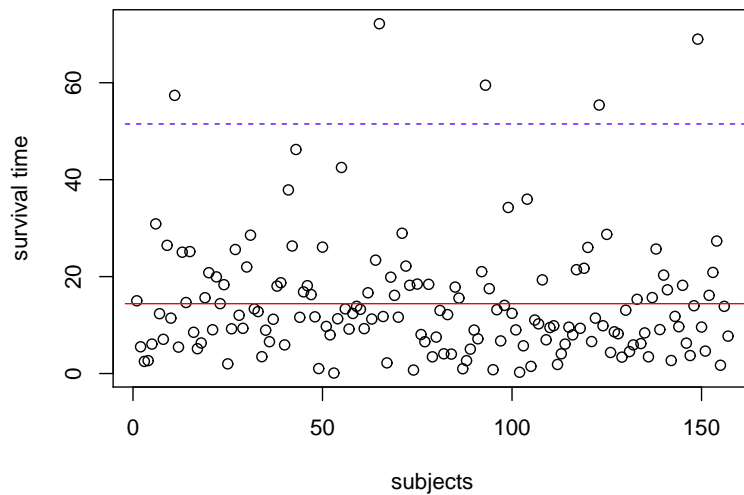

Figure S1: Analysis of STAD data. Scatter plot of survival time with the solid horizontal line indicating  $\text{mean}(\text{survival time})$  and dashed horizontal line indicating  $\text{mean}(\text{survival time}) + 3\text{sd}(\text{survival time})$ .

Table S1: Summary of simulation settings. Table: Table number of the results; Missing: presence of missingness; Distribution: Distribution of G variables; Model: Model for the response; Error: Error distribution.

| Table | Missing | Scenario | Distribution | Model  | Error                               |
|-------|---------|----------|--------------|--------|-------------------------------------|
| 1     | No      | 1        | Continuous   | Linear | $N(0, 1)$                           |
| 1     | No      | 2        | Continuous   | Linear | $90\%N(0, 1) + 10\%Cauchy(0, 5)$    |
| 1     | No      | 3        | Continuous   | Linear | $90\%N(0, 1) + 10\%LogNormal(0, 3)$ |
| 1     | No      | 4        | Continuous   | Linear | $90\%N(0, 1) + 10\%Slash$           |
| 2     | No      | 5        | Continuous   | AFT    | $N(0, 1)$                           |
| 2     | No      | 6        | Continuous   | AFT    | $90\%N(0, 1) + 10\%Cauchy(0, 5)$    |
| 2     | No      | 7        | Continuous   | AFT    | $90\%N(0, 1) + 10\%LogNormal(0, 3)$ |
| 2     | No      | 8        | Continuous   | AFT    | $90\%N(0, 1) + 10\%Slash$           |
| S2    | No      | 9        | Categorical  | Linear | $N(0, 1)$                           |
| S2    | No      | 10       | Categorical  | Linear | $90\%N(0, 1) + 10\%Cauchy(0, 5)$    |
| S2    | No      | 11       | Categorical  | Linear | $90\%N(0, 1) + 10\%LogNormal(0, 3)$ |
| S2    | No      | 12       | Categorical  | Linear | $90\%N(0, 1) + 10\%Slash$           |
| S3    | No      | 13       | Categorical  | AFT    | $N(0, 1)$                           |
| S3    | No      | 14       | Categorical  | AFT    | $90\%N(0, 1) + 10\%Cauchy(0, 5)$    |
| S3    | No      | 15       | Categorical  | AFT    | $90\%N(0, 1) + 10\%LogNormal(0, 3)$ |
| S3    | No      | 16       | Categorical  | AFT    | $90\%N(0, 1) + 10\%Slash$           |
| S4    | Yes     | 1        | Continuous   | Linear | $N(0, 1)$                           |
| S5    | Yes     | 2        | Continuous   | Linear | $90\%N(0, 1) + 10\%Cauchy(0, 5)$    |
| S6    | Yes     | 3        | Continuous   | Linear | $90\%N(0, 1) + 10\%LogNormal(0, 3)$ |
| S7    | Yes     | 4        | Continuous   | Linear | $90\%N(0, 1) + 10\%Slash$           |
| S8    | Yes     | 5        | Continuous   | AFT    | $N(0, 1)$                           |
| S9    | Yes     | 6        | Continuous   | AFT    | $90\%N(0, 1) + 10\%Cauchy(0, 5)$    |
| S10   | Yes     | 7        | Continuous   | AFT    | $90\%N(0, 1) + 10\%LogNormal(0, 3)$ |
| S11   | Yes     | 8        | Continuous   | AFT    | $90\%N(0, 1) + 10\%Slash$           |
| S12   | Yes     | 9        | Categorical  | Linear | $N(0, 1)$                           |
| S13   | Yes     | 10       | Categorical  | Linear | $90\%N(0, 1) + 10\%Cauchy(0, 5)$    |
| S14   | Yes     | 11       | Categorical  | Linear | $90\%N(0, 1) + 10\%LogNormal(0, 3)$ |
| S15   | Yes     | 12       | Categorical  | Linear | $90\%N(0, 1) + 10\%Slash$           |
| S16   | Yes     | 13       | Categorical  | AFT    | $N(0, 1)$                           |
| S17   | Yes     | 14       | Categorical  | AFT    | $90\%N(0, 1) + 10\%Cauchy(0, 5)$    |
| S18   | Yes     | 15       | Categorical  | AFT    | $90\%N(0, 1) + 10\%LogNormal(0, 3)$ |
| S19   | Yes     | 16       | Categorical  | AFT    | $90\%N(0, 1) + 10\%Slash$           |

Table S2: Simulation Scenarios 9-12 without missingness. In each cell, mean (sd) based on 200 replicates.

|             | TP.L     | TP.NL    | FP         | EMSE         | EMISE         | PMSE           |
|-------------|----------|----------|------------|--------------|---------------|----------------|
| Scenario 9  |          |          |            |              |               |                |
| A1          | 8.5(1.7) | 8.7(1.5) | 9.8(4.1)   | 0.72(0.24)   | 1.14(0.66)    | 4.49(1.73)     |
| A2          | 6.9(1.1) | 2.1(0.3) | 14.2(3.4)  | 1.59(0.33)   | 38.52(6.80)   | 13.94(3.65)    |
| A3          | 8.6(2.0) | 8.7(1.6) | 23.3(5.0)  | 0.77(0.29)   | 1.22(0.65)    | 5.23(2.45)     |
| A4          | 4.2(1.4) | 3.8(1.3) | 33.2(2.4)  | 1.24(0.31)   | 2.39(0.72)    | 12.98(5.05)    |
| A5          | 3.0(1.2) | 4.5(0.9) | 30.0(8.5)  | 1.56(0.25)   | 44.57(7.64)   | 9.56(3.44)     |
| Scenario 10 |          |          |            |              |               |                |
| A1          | 7.6(1.4) | 7.6(1.9) | 12.6(4.7)  | 0.89(0.26)   | 1.39(0.75)    | 7.75(3.47)     |
| A2          | 6.3(1.4) | 2.0(0.1) | 14.6(3.5)  | 1.86(0.43)   | 38.12(7.42)   | 18.40(4.67)    |
| A3          | 4.2(2.6) | 3.9(2.5) | 31.4(9.8)  | 4.32(7.64)   | 21.81(54.36)  | 67.92(135.54)  |
| A4          | 3.2(0.9) | 2.8(1.0) | 33.3(2.9)  | 1.35(0.26)   | 3.14(1.19)    | 20.25(3.86)    |
| A5          | 1.1(1.2) | 2.0(1.5) | 18.8(12.4) | 1.83(0.45)   | 22.67(16.15)  | 39.49(55.92)   |
| Scenario 11 |          |          |            |              |               |                |
| A1          | 8.2(1.6) | 8.4(1.7) | 10.5(4.0)  | 0.78(0.24)   | 1.26(0.75)    | 5.92(2.55)     |
| A2          | 6.6(1.2) | 2.0(0.2) | 13.8(3.1)  | 1.73(0.35)   | 37.88(7.75)   | 16.00(4.48)    |
| A3          | 3.2(2.7) | 2.9(2.5) | 33.9(9.7)  | 20.56(80.97) | 65.44(187.42) | 114.39(200.46) |
| A4          | 3.8(1.5) | 3.6(0.8) | 32.0(5.1)  | 1.31(0.25)   | 3.12(1.03)    | 16.47(5.83)    |
| A5          | 0.8(1.1) | 1.3(1.5) | 10.5(11.4) | 1.66(0.22)   | 13.59(13.95)  | 56.48(76.65)   |
| Scenario 12 |          |          |            |              |               |                |
| A1          | 8.6(1.7) | 8.4(1.8) | 10.3(3.6)  | 0.74(0.25)   | 1.16(0.59)    | 5.74(2.63)     |
| A2          | 6.9(1.2) | 2.0(0.2) | 13.6(3.5)  | 1.61(0.30)   | 39.02(7.59)   | 15.59(5.14)    |
| A3          | 7.4(2.9) | 7.2(2.7) | 27.2(7.3)  | 1.31(1.22)   | 2.96(4.09)    | 13.67(16.54)   |
| A4          | 3.4(2.1) | 3.1(1.1) | 34.7(2.4)  | 1.35(0.39)   | 2.75(0.98)    | 17.47(8.04)    |
| A5          | 2.5(1.4) | 3.6(1.6) | 25.3(11.6) | 1.64(0.41)   | 37.34(13.25)  | 14.92(10.65)   |

Table S3: Simulation Scenarios 13-16 without missingness. In each cell, mean (sd) based on 200 replicates.

|             | TP.L     | TP.NL    | FP         | EMSE        | EMISE        | PMSE       |
|-------------|----------|----------|------------|-------------|--------------|------------|
| Scenario 13 |          |          |            |             |              |            |
| A1          | 8.5(1.3) | 8.9(1.1) | 9.8(3.5)   | 0.72(0.19)  | 1.47(0.58)   | 0.87(0.03) |
| A2          | 7.1(1.3) | 2.4(0.6) | 13.4(3.2)  | 1.21(0.26)  | 27.74(4.76)  | 0.79(0.06) |
| A3          | 8.8(1.6) | 9.4(0.9) | 18.7(5.4)  | 0.70(0.22)  | 1.51(0.68)   | 0.87(0.05) |
| A4          | 4.1(1.6) | 3.4(1.2) | 33.4(5.5)  | 1.25(0.17)  | 2.57(0.55)   | 0.77(0.05) |
| A5          | 2.9(1.1) | 5.1(0.7) | 36.2(13.1) | 1.46(0.22)  | 34.65(4.35)  | 0.85(0.03) |
| Scenario 14 |          |          |            |             |              |            |
| A1          | 8.2(1.2) | 7.9(1.7) | 11.1(4.2)  | 0.78(0.19)  | 1.72(0.69)   | 0.82(0.09) |
| A2          | 6.8(1.2) | 2.3(0.5) | 13.2(3.8)  | 1.35(0.25)  | 26.99(5.07)  | 0.76(0.07) |
| A3          | 5.2(2.8) | 4.7(2.6) | 29.4(7.6)  | 4.95(18.70) | 20.34(84.19) | 0.68(0.12) |
| A4          | 2.8(1.6) | 3.5(0.8) | 34.5(3.8)  | 1.44(0.30)  | 3.38(0.69)   | 0.70(0.04) |
| A5          | 1.5(1.4) | 2.6(1.9) | 26.6(17.7) | 1.67(0.34)  | 17.90(13.73) | 0.69(0.11) |
| Scenario 15 |          |          |            |             |              |            |
| A1          | 8.6(1.5) | 8.9(1.1) | 10.0(4.0)  | 0.70(0.22)  | 1.35(0.69)   | 0.86(0.05) |
| A2          | 7.0(1.2) | 2.4(0.5) | 13.8(3.0)  | 1.27(0.26)  | 28.80(5.31)  | 0.77(0.08) |
| A3          | 8.5(1.3) | 9.2(0.9) | 20.2(5.9)  | 0.72(0.20)  | 1.46(0.76)   | 0.85(0.07) |
| A4          | 4.1(2.0) | 3.7(1.2) | 32.3(2.1)  | 1.29(0.37)  | 2.48(0.71)   | 0.76(0.06) |
| A5          | 2.6(1.0) | 5.0(0.9) | 36.1(10.8) | 1.47(0.20)  | 34.29(4.43)  | 0.83(0.05) |
| Scenario 16 |          |          |            |             |              |            |
| A1          | 8.3(1.3) | 8.5(1.5) | 10.4(3.9)  | 0.74(0.18)  | 1.62(0.78)   | 0.86(0.05) |
| A2          | 7.2(1.1) | 2.3(0.6) | 12.8(3.6)  | 1.20(0.21)  | 28.66(5.98)  | 0.79(0.03) |
| A3          | 7.4(2.6) | 7.3(2.7) | 23.2(7.1)  | 1.13(1.01)  | 6.40(20.78)  | 0.81(0.10) |
| A4          | 3.9(1.6) | 3.8(1.2) | 33.1(3.8)  | 1.25(0.28)  | 2.86(0.78)   | 0.75(0.06) |
| A5          | 2.1(1.3) | 4.0(1.6) | 37.8(15.5) | 1.61(0.28)  | 30.40(10.44) | 0.79(0.10) |

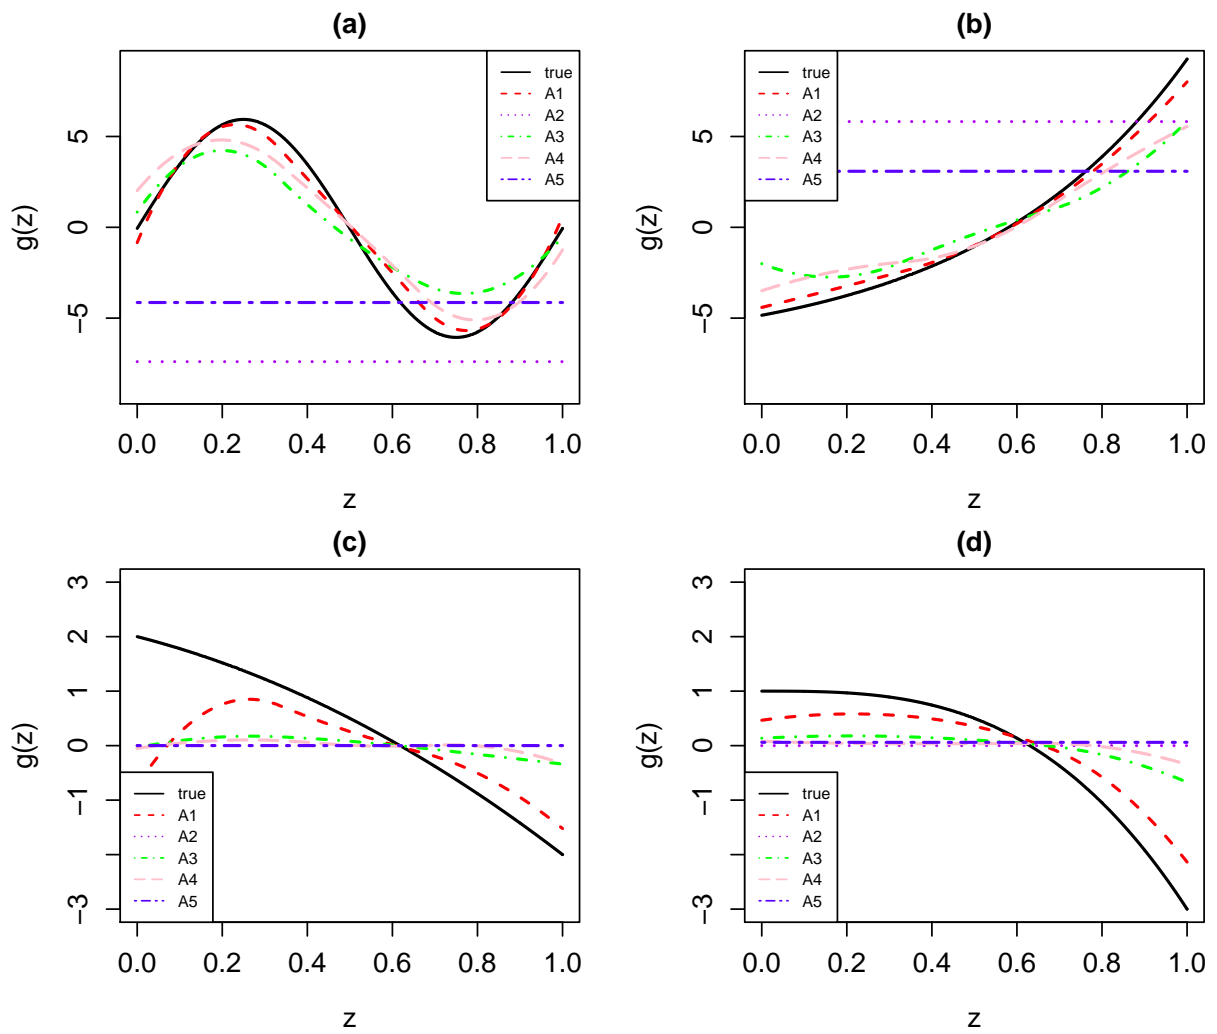

Figure S2: Simulation under Scenario 3: estimation of nonlinear effects. (a)  $g(z) = 6 \sin(2\pi z) - 0.06$ , (b)  $g(z) = 6 \exp(2z - 1) - 7.05$ , (c)  $g(z) = -2z(1 + z) + 2$ , and (d)  $g(z) = -4z^3 + 1$ .

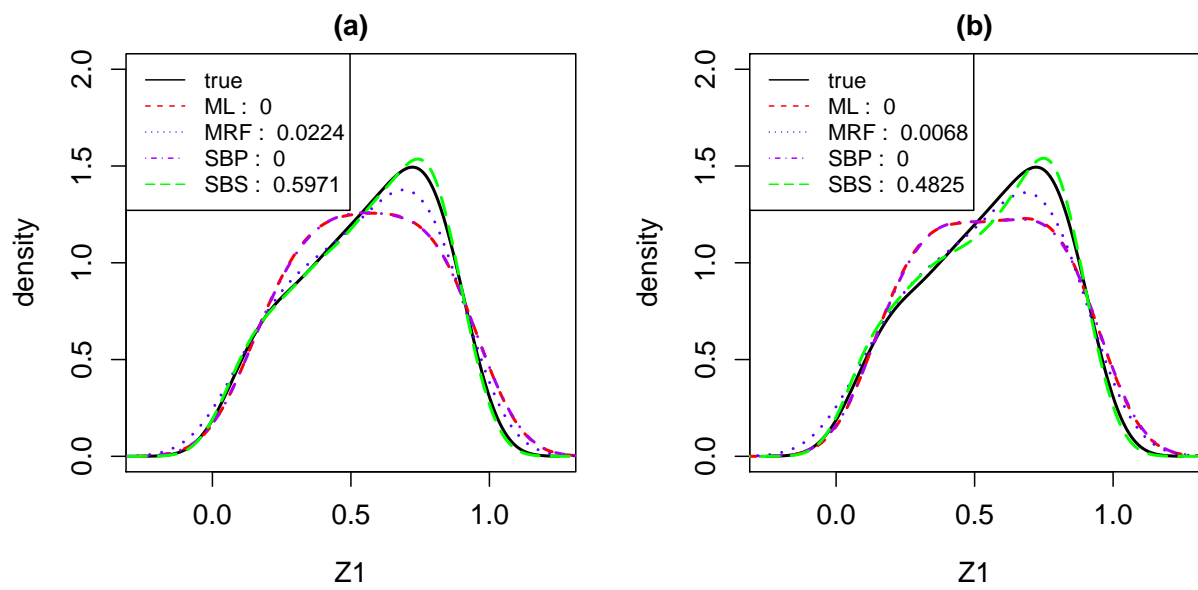

Figure S3: Simulation: density functions of imputed and true  $z_1$  based on 200 replicates. (a) M1; (b) M2.

Table S4: Simulation Scenario 1 with missingness. In each cell, mean (sd) based on 200 replicates.

|        | TP.L     | TP.NL    | FP        | EMSE       | EMISE       | PMSE         |
|--------|----------|----------|-----------|------------|-------------|--------------|
| M1     |          |          |           |            |             |              |
| SBS-A1 | 8.9(1.7) | 9.0(1.4) | 9.5(3.8)  | 0.67(0.23) | 1.00(0.58)  | 4.18(1.65)   |
| CC-A1  | 7.4(1.2) | 7.1(1.9) | 14.1(3.4) | 0.78(0.25) | 1.48(0.79)  | 7.42(2.58)   |
| ML-A2  | 7.4(0.9) | 2.2(0.5) | 24.4(4.3) | 1.52(0.31) | 37.36(6.80) | 13.39(4.12)  |
| SBP-A2 | 7.5(1.0) | 2.3(0.5) | 24.6(5.4) | 1.53(0.31) | 37.24(6.75) | 13.13(3.80)  |
| MRF-A1 | 8.5(1.1) | 8.6(1.6) | 13.3(4.3) | 0.70(0.21) | 1.26(0.82)  | 4.92(1.42)   |
| SBS-A3 | 9.3(1.7) | 9.2(1.4) | 13.3(4.0) | 0.64(0.23) | 1.03(0.56)  | 4.05(1.59)   |
| SBS-A4 | 4.8(1.1) | 4.2(1.4) | 19.8(3.3) | 1.22(0.23) | 2.24(1.28)  | 10.29(9.50)  |
| M2     |          |          |           |            |             |              |
| SBS-A1 | 8.6(1.5) | 8.7(1.5) | 8.0(3.5)  | 0.68(0.24) | 1.09(0.94)  | 4.54(1.61)   |
| CC-A1  | 5.2(1.1) | 4.7(1.4) | 20.7(4.7) | 0.85(0.29) | 2.17(1.49)  | 12.46(4.39)  |
| ML-A2  | 7.2(1.1) | 2.1(0.5) | 13.5(3.1) | 1.50(0.34) | 36.28(7.20) | 13.16(4.72)  |
| SBP-A2 | 7.0(1.0) | 2.1(0.5) | 13.7(3.5) | 1.52(0.33) | 35.82(7.07) | 12.96(3.95)  |
| MRF-A1 | 7.7(1.0) | 6.1(1.8) | 9.1(4.6)  | 0.72(0.23) | 1.84(0.78)  | 6.57(2.23)   |
| SBS-A3 | 9.3(1.6) | 9.2(1.3) | 16.1(6.1) | 0.64(0.20) | 1.13(0.82)  | 4.33(1.65)   |
| SBS-A4 | 2.4(1.1) | 4.1(1.7) | 17.4(2.1) | 1.25(0.26) | 2.22(1.20)  | 10.28(7.16)  |
| M3     |          |          |           |            |             |              |
| SBS-A1 | 8.6(1.3) | 8.8(1.3) | 12.3(3.1) | 0.69(0.24) | 1.15(0.60)  | 4.58(1.46)   |
| CC-A1  | 7.5(1.5) | 7.4(2.0) | 13.9(4.3) | 0.75(0.24) | 1.40(0.87)  | 7.30(3.47)   |
| ML-A2  | 7.2(1.1) | 2.2(0.5) | 17.4(3.3) | 1.48(0.31) | 37.62(7.50) | 12.93(4.17)  |
| SBP-A2 | 7.0(1.0) | 2.2(0.5) | 18.3(3.8) | 1.48(0.31) | 37.45(8.03) | 13.21(3.95)  |
| MRF-A1 | 8.3(1.2) | 8.3(1.6) | 11.5(3.4) | 0.70(0.23) | 1.19(0.67)  | 5.22(1.69)   |
| SBS-A3 | 8.9(1.4) | 9.0(1.4) | 23.0(4.8) | 0.66(0.20) | 1.24(0.56)  | 4.99(1.52)   |
| SBS-A4 | 6.4(2.1) | 4.1(1.4) | 14.2(5.1) | 1.20(0.42) | 2.36(1.74)  | 8.09(4.12)   |
| M4     |          |          |           |            |             |              |
| SBS-A1 | 7.9(1.0) | 7.9(1.6) | 11.3(3.7) | 0.72(0.23) | 1.51(0.69)  | 6.03(1.84)   |
| CC-A1  | 5.2(1.5) | 4.9(1.7) | 21.0(4.0) | 0.87(0.37) | 2.09(1.26)  | 13.44(4.60)  |
| ML-A2  | 7.0(0.9) | 2.1(0.4) | 17.5(3.1) | 1.55(0.32) | 36.73(7.22) | 13.77(3.70)  |
| SBP-A2 | 6.8(1.0) | 2.1(0.4) | 17.3(2.9) | 1.56(0.31) | 36.77(7.67) | 14.03(3.92)  |
| MRF-A1 | 7.7(0.9) | 7.0(1.6) | 12.3(3.4) | 0.74(0.22) | 1.59(0.75)  | 7.05(2.09)   |
| SBS-A3 | 8.3(1.2) | 8.1(1.8) | 22.2(5.6) | 0.69(0.20) | 1.66(0.67)  | 6.49(2.27)   |
| SBS-A4 | 4.8(1.9) | 4.1(1.0) | 9.4(2.1)  | 1.25(0.51) | 2.59(0.78)  | 13.05(10.12) |

Table S5: Simulation Scenario 2 with missingness. In each cell, mean (sd) based on 200 replicates.

|        | TP.L     | TP.NL    | FP         | EMSE          | EMISE         | PMSE           |
|--------|----------|----------|------------|---------------|---------------|----------------|
| M1     |          |          |            |               |               |                |
| SBS-A1 | 7.5(1.6) | 7.7(1.8) | 11.5(4.1)  | 0.87(0.26)    | 1.29(0.53)    | 8.03(4.09)     |
| CC-A1  | 6.1(1.4) | 5.9(1.9) | 15.5(4.8)  | 1.01(0.37)    | 1.90(0.79)    | 12.55(5.61)    |
| ML-A2  | 6.6(1.1) | 2.4(0.4) | 23.3(5.7)  | 1.71(0.40)    | 36.21(7.43)   | 16.73(5.22)    |
| SBP-A2 | 6.6(1.2) | 2.4(0.5) | 23.6(5.3)  | 1.71(0.40)    | 36.08(7.25)   | 16.24(4.49)    |
| MRF-A1 | 7.5(1.4) | 7.5(1.8) | 15.1(4.1)  | 0.89(0.26)    | 1.46(0.57)    | 8.49(3.37)     |
| SBS-A3 | 5.4(2.8) | 5.0(2.7) | 38.6(7.8)  | 39.25(204.24) | 51.88(205.38) | 169.61(712.66) |
| SBS-A4 | 6.0(2.4) | 2.9(1.1) | 23.2(3.8)  | 1.37(0.30)    | 2.62(0.49)    | 14.44(2.82)    |
| M2     |          |          |            |               |               |                |
| SBS-A1 | 7.4(1.4) | 7.4(1.8) | 10.5(5.0)  | 0.87(0.27)    | 1.36(0.61)    | 7.94(3.65)     |
| CC-A1  | 4.8(1.5) | 4.2(1.5) | 21.2(5.1)  | 1.40(1.02)    | 1.85(1.41)    | 18.53(7.51)    |
| ML-A2  | 6.2(1.3) | 2.2(0.4) | 13.1(3.7)  | 1.70(0.40)    | 35.44(7.52)   | 16.61(4.80)    |
| SBP-A2 | 6.2(1.3) | 2.3(0.4) | 12.9(3.6)  | 1.71(0.42)    | 35.95(7.47)   | 16.69(4.84)    |
| MRF-A1 | 6.8(1.1) | 4.8(1.7) | 10.8(5.4)  | 0.93(0.28)    | 2.10(0.56)    | 9.90(3.31)     |
| SBS-A3 | 5.0(2.6) | 4.7(2.7) | 28.2(10.6) | 18.35(82.15)  | 97.50(429.42) | 80.07(254.10)  |
| SBS-A4 | 4.8(2.4) | 2.8(1.0) | 21.1(4.6)  | 1.38(0.33)    | 2.55(0.40)    | 13.40(2.84)    |
| M3     |          |          |            |               |               |                |
| SBS-A1 | 7.1(1.3) | 6.9(1.9) | 9.1(3.3)   | 0.91(0.28)    | 1.50(0.62)    | 8.15(3.40)     |
| CC-A1  | 6.1(1.6) | 5.8(1.9) | 15.7(5.3)  | 1.02(0.31)    | 1.75(0.63)    | 12.01(4.71)    |
| ML-A2  | 6.2(1.3) | 2.1(0.4) | 12.5(3.6)  | 1.74(0.44)    | 36.48(7.21)   | 16.69(4.41)    |
| SBP-A2 | 5.9(1.2) | 2.1(0.4) | 12.5(3.7)  | 1.76(0.43)    | 36.34(7.54)   | 16.74(5.02)    |
| MRF-A1 | 7.0(1.3) | 6.6(1.9) | 8.9(3.3)   | 0.93(0.29)    | 1.50(0.56)    | 9.03(3.45)     |
| SBS-A3 | 5.0(2.5) | 4.5(2.6) | 24.1(9.0)  | 36.63(190.32) | 53.06(227.49) | 148.34(620.87) |
| SBS-A4 | 6.0(3.4) | 2.6(1.4) | 15.2(6.6)  | 1.36(0.25)    | 2.89(0.54)    | 17.96(3.21)    |
| M4     |          |          |            |               |               |                |
| SBS-A1 | 6.8(1.2) | 6.5(1.6) | 12.6(3.2)  | 0.97(0.31)    | 1.84(0.65)    | 9.82(3.17)     |
| CC-A1  | 4.5(1.5) | 4.0(1.5) | 21.0(5.8)  | 1.08(0.32)    | 2.54(1.04)    | 19.38(7.25)    |
| ML-A2  | 6.2(1.1) | 2.2(0.4) | 16.4(4.0)  | 1.81(0.50)    | 35.18(7.83)   | 17.13(5.20)    |
| SBP-A2 | 6.0(1.3) | 2.1(0.4) | 16.4(4.4)  | 1.83(0.53)    | 36.08(8.85)   | 17.38(5.24)    |
| MRF-A1 | 6.6(1.3) | 5.8(1.7) | 14.1(3.9)  | 0.98(0.29)    | 1.93(0.64)    | 10.38(3.12)    |
| SBS-A3 | 5.0(2.5) | 4.3(2.2) | 33.6(9.2)  | 34.89(175.99) | 47.69(195.19) | 138.46(570.54) |
| SBS-A4 | 6.0(3.4) | 2.0(0.8) | 14.2(3.0)  | 1.37(0.25)    | 3.04(0.45)    | 18.49(0.74)    |



Table S6: Simulation Scenario 3 with missingness. In each cell, mean (sd) based on 200 replicates.

|        | TP.L     | TP.NL    | FP         | EMSE          | EMISE         | PMSE           |
|--------|----------|----------|------------|---------------|---------------|----------------|
| M1     |          |          |            |               |               |                |
| SBS-A1 | 8.2(1.4) | 8.3(1.4) | 9.5(3.1)   | 0.77(0.26)    | 1.19(0.76)    | 5.59(2.52)     |
| CC-A1  | 6.8(1.4) | 6.3(1.7) | 14.8(4.2)  | 0.86(0.33)    | 1.81(0.97)    | 9.70(3.32)     |
| ML-A2  | 6.8(1.0) | 2.1(0.3) | 22.0(6.6)  | 1.63(0.37)    | 36.74(6.59)   | 14.69(3.30)    |
| SBP-A2 | 6.7(1.1) | 2.1(0.4) | 22.1(5.7)  | 1.63(0.37)    | 36.65(6.37)   | 14.34(3.38)    |
| MRF-A1 | 8.0(1.1) | 8.2(1.4) | 13.8(3.9)  | 0.79(0.25)    | 1.44(0.81)    | 6.38(2.16)     |
| SBS-A3 | 3.4(2.5) | 3.1(2.6) | 23.6(12.3) | 40.94(129.57) | 61.66(219.16) | 161.04(373.70) |
| SBS-A4 | 4.3(4.0) | 2.9(1.2) | 18.6(13.9) | 1.28(0.37)    | 2.51(0.30)    | 12.56(7.81)    |
| M2     |          |          |            |               |               |                |
| SBS-A1 | 8.0(1.4) | 8.0(1.7) | 9.1(3.6)   | 0.77(0.27)    | 1.30(1.06)    | 5.82(2.34)     |
| CC-A1  | 4.8(1.3) | 4.6(1.4) | 19.1(4.8)  | 0.96(0.41)    | 2.75(2.13)    | 15.67(6.92)    |
| ML-A2  | 6.4(1.1) | 2.0(0.3) | 12.5(4.4)  | 1.62(0.36)    | 35.26(6.51)   | 14.56(3.63)    |
| SBP-A2 | 6.5(0.9) | 2.1(0.3) | 12.6(3.9)  | 1.62(0.38)    | 35.07(6.68)   | 14.33(3.67)    |
| MRF-A1 | 7.5(1.2) | 5.7(1.4) | 9.3(4.6)   | 0.81(0.26)    | 2.12(0.97)    | 8.03(2.92)     |
| SBS-A3 | 3.5(2.6) | 3.0(2.5) | 22.9(14.0) | 41.78(132.35) | 55.65(189.52) | 162.34(384.84) |
| SBS-A4 | 0.0(0.0) | 3.4(1.6) | 17.0(5.0)  | 1.36(0.09)    | 2.26(0.19)    | 16.94(8.76)    |
| M3     |          |          |            |               |               |                |
| SBS-A1 | 7.7(1.2) | 7.6(1.6) | 8.0(2.9)   | 0.78(0.27)    | 1.39(0.76)    | 6.31(2.56)     |
| CC-A1  | 6.6(1.6) | 6.4(1.8) | 15.7(5.0)  | 0.87(0.27)    | 1.97(1.54)    | 10.30(5.48)    |
| ML-A2  | 6.3(1.1) | 2.1(0.3) | 11.7(3.8)  | 1.61(0.40)    | 36.45(7.03)   | 14.02(3.23)    |
| SBP-A2 | 6.2(0.9) | 2.0(0.3) | 11.7(3.7)  | 1.62(0.39)    | 36.80(7.62)   | 14.46(3.44)    |
| MRF-A1 | 7.6(1.2) | 7.3(1.6) | 7.6(2.5)   | 0.79(0.26)    | 1.46(0.90)    | 6.81(2.41)     |
| SBS-A3 | 3.7(2.5) | 3.1(2.5) | 28.3(9.5)  | 37.42(109.63) | 55.83(219.77) | 142.32(312.29) |
| SBS-A4 | 6.8(4.0) | 2.8(0.5) | 11.6(4.3)  | 1.27(0.28)    | 2.57(0.48)    | 14.20(3.22)    |
| M4     |          |          |            |               |               |                |
| SBS-A1 | 7.5(1.2) | 7.2(1.6) | 10.8(3.3)  | 0.82(0.29)    | 1.73(0.80)    | 7.35(2.50)     |
| CC-A1  | 4.7(1.5) | 4.4(1.5) | 20.1(5.3)  | 0.98(0.42)    | 2.76(2.00)    | 17.63(8.57)    |
| ML-A2  | 6.4(1.0) | 2.1(0.3) | 15.5(4.1)  | 1.70(0.39)    | 35.17(6.74)   | 15.01(3.55)    |
| SBP-A2 | 6.3(0.9) | 2.1(0.3) | 15.7(4.1)  | 1.70(0.38)    | 35.93(7.76)   | 15.58(3.82)    |
| MRF-A1 | 7.3(1.2) | 6.5(1.5) | 12.1(3.3)  | 0.83(0.27)    | 1.85(0.92)    | 8.81(3.17)     |
| SBS-A3 | 3.9(2.5) | 3.3(2.5) | 35.9(8.2)  | 47.90(175.16) | 45.79(190.14) | 189.34(562.70) |
| SBS-A4 | 1.7(2.0) | 2.5(1.1) | 10.5(13.6) | 1.29(0.42)    | 2.86(0.23)    | 22.06(8.78)    |

Table S7: Simulation Scenario 4 with missingness. In each cell, mean (sd) based on 200 replicates.

|        | TP.L     | TP.NL    | FP        | EMSE       | EMISE       | PMSE         |
|--------|----------|----------|-----------|------------|-------------|--------------|
| M1     |          |          |           |            |             |              |
| SBS-A1 | 8.6(1.6) | 8.6(1.4) | 9.0(3.9)  | 0.72(0.24) | 1.08(0.68)  | 5.42(2.43)   |
| CC-A1  | 7.3(1.4) | 7.1(1.7) | 13.5(4.5) | 0.83(0.27) | 1.55(1.42)  | 8.63(3.57)   |
| ML-A2  | 7.2(1.0) | 2.3(0.5) | 24.1(4.9) | 1.64(0.33) | 37.51(6.95) | 15.02(4.40)  |
| SBP-A2 | 7.2(1.0) | 2.3(0.5) | 24.4(5.2) | 1.63(0.32) | 37.60(6.74) | 14.97(4.50)  |
| MRF-A1 | 8.3(1.3) | 8.3(1.6) | 12.3(4.7) | 0.76(0.23) | 1.23(0.59)  | 5.99(2.29)   |
| SBS-A3 | 8.1(2.5) | 7.7(2.4) | 17.6(6.6) | 1.06(0.92) | 2.42(2.84)  | 8.54(6.27)   |
| SBS-A4 | 2.6(1.3) | 3.8(1.6) | 20.8(3.3) | 1.34(0.17) | 2.67(0.55)  | 18.12(12.26) |
| M2     |          |          |           |            |             |              |
| SBS-A1 | 8.3(1.6) | 8.5(1.4) | 8.1(3.2)  | 0.74(0.24) | 1.06(0.50)  | 5.43(2.47)   |
| CC-A1  | 5.1(1.3) | 4.7(1.5) | 19.8(5.2) | 0.92(0.35) | 2.31(1.63)  | 15.66(6.04)  |
| ML-A2  | 6.7(1.1) | 2.1(0.4) | 13.3(2.7) | 1.61(0.29) | 36.31(6.56) | 15.19(4.67)  |
| SBP-A2 | 6.7(1.0) | 2.1(0.4) | 13.4(2.9) | 1.61(0.29) | 36.51(6.46) | 14.82(4.77)  |
| MRF-A1 | 7.5(1.0) | 5.8(1.6) | 8.5(5.1)  | 0.80(0.23) | 1.84(0.88)  | 8.21(3.19)   |
| SBS-A3 | 8.0(2.5) | 7.7(2.4) | 21.0(6.7) | 1.07(0.95) | 2.26(2.39)  | 9.13(8.18)   |
| SBS-A4 | 2.6(1.3) | 3.9(1.0) | 16.0(2.9) | 1.33(0.09) | 2.54(0.80)  | 17.60(5.75)  |
| M3     |          |          |           |            |             |              |
| SBS-A1 | 8.0(1.3) | 7.9(1.5) | 7.3(2.6)  | 0.76(0.24) | 1.21(0.53)  | 6.26(2.34)   |
| CC-A1  | 6.7(1.1) | 6.5(1.6) | 13.9(4.1) | 0.87(0.26) | 1.64(1.27)  | 9.03(3.43)   |
| ML-A2  | 6.8(1.0) | 2.1(0.4) | 12.4(3.2) | 1.58(0.31) | 37.41(6.84) | 14.57(3.61)  |
| SBP-A2 | 6.8(1.0) | 2.1(0.4) | 12.2(3.1) | 1.60(0.29) | 37.82(7.07) | 14.53(4.15)  |
| MRF-A1 | 8.0(1.4) | 7.8(1.4) | 7.5(2.8)  | 0.76(0.23) | 1.29(0.74)  | 6.60(2.44)   |
| SBS-A3 | 7.8(2.4) | 7.0(2.4) | 17.3(5.6) | 1.07(0.78) | 2.40(2.72)  | 8.98(6.71)   |
| SBS-A4 | 2.6(1.3) | 3.9(2.2) | 13.0(3.0) | 1.33(0.09) | 2.53(0.61)  | 20.39(4.71)  |
| M4     |          |          |           |            |             |              |
| SBS-A1 | 7.9(1.1) | 7.7(1.4) | 10.8(3.2) | 0.80(0.26) | 1.52(0.69)  | 7.66(2.76)   |
| CC-A1  | 5.3(1.3) | 4.6(1.6) | 19.8(4.6) | 0.93(0.33) | 2.01(1.03)  | 15.42(6.00)  |
| ML-A2  | 6.8(1.0) | 2.1(0.4) | 17.2(3.6) | 1.65(0.29) | 36.12(6.79) | 15.30(3.81)  |
| SBP-A2 | 6.6(1.0) | 2.1(0.4) | 17.3(3.4) | 1.67(0.32) | 36.54(6.93) | 15.50(4.28)  |
| MRF-A1 | 7.5(0.9) | 6.6(1.4) | 11.7(3.4) | 0.82(0.25) | 1.69(0.73)  | 8.66(2.82)   |
| SBS-A3 | 7.7(2.0) | 6.8(2.3) | 26.5(6.3) | 1.12(0.91) | 2.73(2.59)  | 9.68(6.26)   |
| SBS-A4 | 4.1(2.1) | 3.4(2.6) | 13.2(2.9) | 1.29(0.14) | 3.43(1.30)  | 29.07(4.02)  |

Table S8: Simulation Scenario 5 with missingness. In each cell, mean (sd) based on 200 replicates.

|        | TP.L     | TP.NL    | FP        | EMSE       | EMISE       | PMSE       |
|--------|----------|----------|-----------|------------|-------------|------------|
| M1     |          |          |           |            |             |            |
| SBS-A1 | 8.5(1.4) | 9.2(1.0) | 8.0(2.5)  | 0.71(0.17) | 1.43(0.47)  | 0.88(0.05) |
| CC-A1  | 7.0(1.3) | 6.9(1.7) | 9.1(2.9)  | 0.81(0.17) | 1.95(0.56)  | 0.84(0.06) |
| ML-A2  | 7.1(1.2) | 2.5(0.5) | 13.2(3.2) | 1.16(0.29) | 26.88(4.47) | 0.79(0.02) |
| SBP-A2 | 7.2(1.2) | 2.5(0.6) | 12.8(2.9) | 1.16(0.28) | 26.85(4.39) | 0.79(0.03) |
| MRF-A1 | 8.0(0.9) | 8.2(1.4) | 9.1(2.7)  | 0.74(0.12) | 1.72(0.52)  | 0.87(0.04) |
| SBS-A3 | 9.2(1.6) | 9.6(0.7) | 15.5(4.3) | 0.65(0.19) | 1.27(0.40)  | 0.89(0.04) |
| SBS-A4 | 5.9(0.9) | 3.9(1.3) | 25.3(3.9) | 1.23(0.21) | 2.22(1.64)  | 0.83(0.02) |
| M2     |          |          |           |            |             |            |
| SBS-A1 | 8.4(1.1) | 9.0(1.0) | 8.1(2.3)  | 0.71(0.14) | 1.46(0.53)  | 0.88(0.04) |
| CC-A1  | 4.4(1.3) | 3.9(1.2) | 9.5(2.2)  | 0.93(0.28) | 3.02(0.98)  | 0.76(0.06) |
| ML-A2  | 7.3(1.2) | 2.5(0.5) | 12.8(2.9) | 1.16(0.29) | 25.33(4.59) | 0.79(0.02) |
| SBP-A2 | 7.2(1.1) | 2.5(0.5) | 12.9(3.2) | 1.16(0.28) | 25.36(4.83) | 0.80(0.02) |
| MRF-A1 | 7.6(0.7) | 5.8(1.6) | 12.3(2.9) | 0.78(0.15) | 2.69(0.62)  | 0.85(0.05) |
| SBS-A3 | 9.3(1.6) | 9.5(0.7) | 14.5(4.1) | 0.66(0.19) | 1.26(0.39)  | 0.89(0.04) |
| SBS-A4 | 5.9(0.9) | 3.6(1.6) | 24.2(1.8) | 1.23(0.21) | 2.23(1.46)  | 0.83(0.01) |
| M3     |          |          |           |            |             |            |
| SBS-A1 | 8.0(1.1) | 8.5(1.2) | 7.8(2.7)  | 0.72(0.14) | 1.70(0.44)  | 0.87(0.04) |
| CC-A1  | 6.9(1.3) | 6.9(1.6) | 9.5(3.1)  | 0.79(0.19) | 1.94(0.68)  | 0.83(0.07) |
| ML-A2  | 7.0(1.1) | 2.3(0.5) | 13.2(3.0) | 1.18(0.29) | 27.02(4.76) | 0.79(0.03) |
| SBP-A2 | 6.8(1.1) | 2.2(0.5) | 13.2(3.0) | 1.19(0.29) | 27.22(4.65) | 0.79(0.02) |
| MRF-A1 | 7.7(0.7) | 8.1(1.3) | 8.3(2.2)  | 0.74(0.11) | 1.76(0.47)  | 0.86(0.05) |
| SBS-A3 | 8.7(1.3) | 9.5(0.7) | 12.3(3.7) | 0.68(0.18) | 1.45(0.40)  | 0.89(0.03) |
| SBS-A4 | 5.9(0.9) | 3.5(1.7) | 16.8(2.0) | 1.24(0.21) | 2.45(1.56)  | 0.82(0.02) |
| M4     |          |          |           |            |             |            |
| SBS-A1 | 7.6(0.9) | 7.4(1.2) | 12.2(3.4) | 0.75(0.15) | 2.14(0.40)  | 0.84(0.05) |
| CC-A1  | 4.6(1.6) | 4.3(1.4) | 9.5(3.1)  | 0.94(0.27) | 3.69(4.03)  | 0.75(0.09) |
| ML-A2  | 6.9(1.1) | 2.2(0.5) | 17.4(3.5) | 1.25(0.31) | 25.98(4.66) | 0.78(0.03) |
| SBP-A2 | 6.7(1.0) | 2.0(0.5) | 17.1(3.8) | 1.27(0.31) | 26.01(4.89) | 0.78(0.02) |
| MRF-A1 | 7.2(0.8) | 6.4(1.5) | 13.6(3.1) | 0.77(0.15) | 2.48(0.65)  | 0.83(0.05) |
| SBS-A3 | 8.4(1.1) | 9.1(0.8) | 11.4(3.4) | 0.70(0.15) | 1.77(0.40)  | 0.88(0.04) |
| SBS-A4 | 5.9(0.9) | 3.6(0.8) | 16.8(2.3) | 1.24(0.19) | 2.84(1.68)  | 0.80(0.04) |

Table S9: Simulation Scenario 6 with missingness. In each cell, mean (sd) based on 200 replicates.

|        | TP.L     | TP.NL    | FP        | EMSE        | EMISE        | PMSE       |
|--------|----------|----------|-----------|-------------|--------------|------------|
| M1     |          |          |           |             |              |            |
| SBS-A1 | 8.1(1.1) | 8.6(1.6) | 7.8(3.4)  | 0.77(0.19)  | 1.59(0.80)   | 0.84(0.05) |
| CC-A1  | 6.2(1.6) | 5.7(1.7) | 8.7(3.4)  | 0.86(0.25)  | 2.40(1.54)   | 0.79(0.06) |
| ML-A2  | 6.4(1.0) | 2.5(0.5) | 13.0(4.0) | 1.29(0.28)  | 26.30(5.50)  | 0.76(0.07) |
| SBP-A2 | 6.5(1.0) | 2.5(0.5) | 12.7(3.9) | 1.27(0.28)  | 26.16(5.45)  | 0.77(0.07) |
| MRF-A1 | 7.7(1.1) | 7.4(1.9) | 7.8(3.4)  | 0.78(0.20)  | 1.92(1.08)   | 0.83(0.06) |
| SBS-A3 | 5.6(3.2) | 5.3(2.8) | 25.6(7.8) | 9.26(77.94) | 22.91(83.68) | 0.71(0.14) |
| SBS-A4 | 4.1(0.8) | 4.2(0.4) | 24.7(2.3) | 1.45(0.42)  | 2.21(0.40)   | 0.81(0.01) |
| M2     |          |          |           |             |              |            |
| SBS-A1 | 8.1(1.1) | 8.4(1.6) | 7.7(3.4)  | 0.77(0.19)  | 1.62(0.75)   | 0.84(0.06) |
| CC-A1  | 3.9(1.6) | 3.7(1.2) | 8.0(3.5)  | 1.01(0.39)  | 3.87(4.25)   | 0.73(0.05) |
| ML-A2  | 6.5(1.0) | 2.4(0.5) | 12.2(3.7) | 1.29(0.30)  | 24.96(5.11)  | 0.77(0.07) |
| SBP-A2 | 6.5(1.0) | 2.5(0.6) | 12.3(3.9) | 1.30(0.31)  | 24.88(4.62)  | 0.77(0.07) |
| MRF-A1 | 7.5(1.0) | 5.3(1.5) | 10.7(3.6) | 0.81(0.21)  | 2.74(1.12)   | 0.81(0.06) |
| SBS-A3 | 5.6(3.1) | 5.4(2.8) | 24.6(7.4) | 9.08(78.24) | 22.88(88.04) | 0.72(0.13) |
| SBS-A4 | 2.6(0.9) | 4.2(0.4) | 24.0(2.2) | 1.49(0.31)  | 2.22(0.36)   | 0.80(0.01) |
| M3     |          |          |           |             |              |            |
| SBS-A1 | 7.8(1.0) | 7.8(1.5) | 7.6(2.7)  | 0.77(0.19)  | 1.87(0.80)   | 0.83(0.06) |
| CC-A1  | 6.3(1.5) | 5.9(1.6) | 8.4(3.7)  | 0.89(0.22)  | 2.34(1.59)   | 0.78(0.07) |
| ML-A2  | 6.3(1.2) | 2.3(0.6) | 12.5(3.7) | 1.29(0.25)  | 27.27(5.40)  | 0.76(0.07) |
| SBP-A2 | 6.3(1.1) | 2.2(0.6) | 12.1(3.5) | 1.30(0.26)  | 27.35(5.50)  | 0.76(0.06) |
| MRF-A1 | 7.5(1.1) | 7.1(1.6) | 7.3(2.6)  | 0.78(0.20)  | 1.98(0.87)   | 0.82(0.06) |
| SBS-A3 | 5.7(3.3) | 5.1(2.7) | 21.9(7.8) | 9.72(89.04) | 21.31(79.54) | 0.71(0.16) |
| SBS-A4 | 4.1(0.8) | 4.2(0.4) | 18.0(2.9) | 1.47(0.40)  | 2.30(0.36)   | 0.80(0.01) |
| M4     |          |          |           |             |              |            |
| SBS-A1 | 7.6(1.0) | 6.8(1.4) | 10.9(3.9) | 0.81(0.19)  | 2.26(0.89)   | 0.81(0.06) |
| CC-A1  | 3.7(1.5) | 3.6(1.2) | 7.6(3.3)  | 0.98(0.29)  | 4.36(8.10)   | 0.71(0.07) |
| ML-A2  | 6.1(1.1) | 2.2(0.5) | 15.6(4.6) | 1.39(0.32)  | 25.66(5.53)  | 0.75(0.06) |
| SBP-A2 | 6.0(1.3) | 2.1(0.6) | 15.4(4.5) | 1.41(0.34)  | 26.31(5.34)  | 0.74(0.06) |
| MRF-A1 | 7.0(1.3) | 5.9(1.5) | 11.4(3.8) | 0.81(0.18)  | 2.56(1.08)   | 0.80(0.06) |
| SBS-A3 | 5.4(2.8) | 4.9(2.7) | 20.1(6.3) | 8.43(76.13) | 21.73(80.50) | 0.72(0.13) |
| SBS-A4 | 2.6(0.9) | 4.0(0.7) | 17.6(1.4) | 1.50(0.35)  | 2.62(0.34)   | 0.80(0.01) |

Table S10: Simulation Scenario 7 with missingness. In each cell, mean (sd) based on 200 replicates.

|        | TP.L     | TP.NL    | FP        | EMSE       | EMISE       | PMSE       |
|--------|----------|----------|-----------|------------|-------------|------------|
| M1     |          |          |           |            |             |            |
| SBS-A1 | 8.8(1.7) | 9.1(1.4) | 7.2(3.3)  | 0.69(0.19) | 1.50(0.81)  | 0.87(0.04) |
| CC-A1  | 7.1(1.6) | 6.8(1.6) | 7.6(3.6)  | 0.80(0.25) | 2.15(1.52)  | 0.82(0.07) |
| ML-A2  | 7.0(0.9) | 2.4(0.6) | 12.2(3.9) | 1.25(0.26) | 27.82(4.97) | 0.79(0.04) |
| SBP-A2 | 7.0(1.0) | 2.4(0.5) | 11.4(3.8) | 1.25(0.25) | 27.73(4.88) | 0.79(0.04) |
| MRF-A1 | 8.1(1.3) | 8.1(1.6) | 7.9(3.1)  | 0.73(0.16) | 1.84(1.08)  | 0.86(0.05) |
| SBS-A3 | 8.2(1.4) | 8.6(1.3) | 12.8(4.9) | 0.75(0.24) | 1.37(0.65)  | 0.85(0.03) |
| SBS-A4 | 5.4(1.1) | 4.1(3.8) | 27.9(4.9) | 1.27(0.31) | 2.01(1.10)  | 0.79(0.05) |
| M2     |          |          |           |            |             |            |
| SBS-A1 | 8.7(1.5) | 8.9(1.2) | 7.1(3.2)  | 0.70(0.17) | 1.53(0.76)  | 0.87(0.04) |
| CC-A1  | 4.3(1.6) | 3.8(1.2) | 7.7(3.4)  | 0.91(0.37) | 3.98(6.14)  | 0.76(0.06) |
| ML-A2  | 6.9(1.1) | 2.3(0.6) | 12.2(3.8) | 1.25(0.28) | 26.25(4.97) | 0.79(0.04) |
| SBP-A2 | 6.8(1.0) | 2.2(0.6) | 12.2(3.6) | 1.27(0.28) | 26.36(4.96) | 0.78(0.04) |
| MRF-A1 | 7.8(1.0) | 5.8(1.6) | 10.4(3.1) | 0.77(0.18) | 2.79(1.17)  | 0.84(0.05) |
| SBS-A3 | 8.1(1.4) | 8.4(1.4) | 13.0(4.0) | 0.75(0.24) | 1.37(0.56)  | 0.85(0.03) |
| SBS-A4 | 5.4(1.1) | 4.3(2.7) | 23.4(3.9) | 1.27(0.31) | 1.96(1.03)  | 0.79(0.05) |
| M3     |          |          |           |            |             |            |
| SBS-A1 | 8.4(1.5) | 8.4(1.5) | 7.1(2.9)  | 0.71(0.17) | 1.82(1.00)  | 0.85(0.05) |
| CC-A1  | 7.2(1.6) | 6.9(1.6) | 8.0(3.8)  | 0.78(0.19) | 2.01(1.19)  | 0.83(0.06) |
| ML-A2  | 6.8(1.1) | 2.2(0.5) | 11.7(3.8) | 1.25(0.26) | 27.75(4.70) | 0.78(0.04) |
| SBP-A2 | 6.7(0.9) | 2.1(0.5) | 11.9(3.8) | 1.26(0.26) | 27.94(4.72) | 0.78(0.05) |
| MRF-A1 | 8.1(1.5) | 7.7(1.7) | 6.9(3.0)  | 0.72(0.16) | 1.95(1.19)  | 0.85(0.06) |
| SBS-A3 | 8.1(1.4) | 8.2(1.4) | 11.8(4.2) | 0.76(0.24) | 1.56(0.64)  | 0.84(0.04) |
| SBS-A4 | 5.4(1.1) | 3.9(2.8) | 19.5(5.2) | 1.27(0.29) | 2.31(1.26)  | 0.79(0.05) |
| M4     |          |          |           |            |             |            |
| SBS-A1 | 7.9(1.3) | 7.5(1.6) | 10.2(4.0) | 0.74(0.18) | 2.33(1.03)  | 0.84(0.05) |
| CC-A1  | 4.6(1.7) | 3.9(1.2) | 8.1(3.5)  | 0.92(0.38) | 3.58(2.60)  | 0.76(0.07) |
| ML-A2  | 6.6(1.2) | 2.1(0.6) | 15.2(5.4) | 1.32(0.27) | 26.88(5.26) | 0.77(0.04) |
| SBP-A2 | 6.5(1.1) | 2.0(0.5) | 15.2(4.0) | 1.36(0.29) | 26.92(5.35) | 0.77(0.04) |
| MRF-A1 | 7.4(1.2) | 6.5(1.6) | 11.4(3.7) | 0.76(0.18) | 2.63(1.26)  | 0.83(0.05) |
| SBS-A3 | 7.8(1.2) | 7.7(1.5) | 11.1(4.2) | 0.79(0.23) | 1.93(0.66)  | 0.84(0.03) |
| SBS-A4 | 2.1(0.9) | 4.3(3.0) | 17.5(5.8) | 1.29(0.25) | 2.55(0.84)  | 0.77(0.04) |

Table S11: Simulation Scenario 8 with missingness. In each cell, mean (sd) based on 200 replicates.

|        | TP.L     | TP.NL    | FP        | EMSE          | EMISE          | PMSE       |
|--------|----------|----------|-----------|---------------|----------------|------------|
| M1     |          |          |           |               |                |            |
| SBS-A1 | 8.2(1.1) | 8.8(1.3) | 8.5(3.1)  | 0.71(0.15)    | 1.54(0.62)     | 0.86(0.07) |
| CC-A1  | 6.8(1.2) | 6.7(1.6) | 10.2(3.5) | 0.80(0.18)    | 2.20(1.19)     | 0.81(0.11) |
| ML-A2  | 7.0(1.1) | 2.3(0.6) | 13.7(3.4) | 1.22(0.28)    | 27.11(5.79)    | 0.79(0.05) |
| SBP-A2 | 7.1(1.1) | 2.4(0.6) | 13.7(3.3) | 1.22(0.28)    | 27.15(5.62)    | 0.80(0.05) |
| MRF-A1 | 7.6(0.7) | 8.0(1.6) | 9.0(2.7)  | 0.74(0.14)    | 1.84(0.68)     | 0.84(0.08) |
| SBS-A3 | 8.2(2.0) | 8.3(2.1) | 18.9(9.6) | 23.57(935.83) | 95.92(4417.74) | 0.82(0.10) |
| SBS-A4 | 9.8(0.0) | 4.0(0.3) | 26.4(2.2) | 1.36(0.05)    | 2.38(0.32)     | 0.82(0.03) |
| M2     |          |          |           |               |                |            |
| SBS-A1 | 7.8(0.8) | 8.6(1.3) | 8.8(3.6)  | 0.73(0.14)    | 1.52(0.60)     | 0.85(0.08) |
| CC-A1  | 3.8(1.2) | 3.5(1.3) | 9.4(2.7)  | 0.96(0.34)    | 3.49(1.36)     | 0.72(0.08) |
| ML-A2  | 7.1(1.1) | 2.3(0.7) | 13.9(3.3) | 1.22(0.27)    | 26.06(6.11)    | 0.79(0.05) |
| SBP-A2 | 7.0(1.1) | 2.3(0.7) | 13.6(3.1) | 1.22(0.27)    | 26.02(6.16)    | 0.80(0.04) |
| MRF-A1 | 7.4(0.8) | 5.7(1.7) | 12.0(3.3) | 0.76(0.15)    | 2.64(0.76)     | 0.83(0.08) |
| SBS-A3 | 8.2(2.0) | 8.3(2.1) | 17.5(9.1) | 23.43(935.83) | 95.61(4417.99) | 0.83(0.09) |
| SBS-A4 | 9.8(0.0) | 3.6(0.6) | 21.3(1.4) | 1.36(0.05)    | 2.51(0.35)     | 0.81(0.00) |
| M3     |          |          |           |               |                |            |
| SBS-A1 | 7.7(0.7) | 8.1(1.3) | 7.8(2.5)  | 0.72(0.14)    | 1.80(0.47)     | 0.84(0.08) |
| CC-A1  | 6.7(1.0) | 6.5(1.7) | 10.0(3.4) | 0.78(0.16)    | 2.12(0.64)     | 0.81(0.09) |
| ML-A2  | 6.9(1.1) | 2.1(0.6) | 13.6(2.8) | 1.26(0.27)    | 27.43(5.99)    | 0.79(0.05) |
| SBP-A2 | 6.7(1.1) | 2.0(0.7) | 13.6(3.5) | 1.28(0.29)    | 27.66(6.03)    | 0.78(0.04) |
| MRF-A1 | 7.5(0.7) | 7.5(1.2) | 8.3(2.7)  | 0.73(0.15)    | 1.95(0.53)     | 0.83(0.09) |
| SBS-A3 | 7.9(1.7) | 8.2(2.1) | 16.8(9.2) | 23.52(939.62) | 96.94(4385.45) | 0.82(0.09) |
| SBS-A4 | 9.8(0.0) | 3.5(0.5) | 21.3(2.2) | 1.36(0.04)    | 2.81(0.46)     | 0.80(0.03) |
| M4     |          |          |           |               |                |            |
| SBS-A1 | 7.4(0.8) | 6.9(1.3) | 12.0(3.5) | 0.75(0.15)    | 2.25(0.50)     | 0.82(0.07) |
| CC-A1  | 4.2(1.1) | 3.9(1.1) | 9.5(3.1)  | 0.91(0.27)    | 3.08(1.44)     | 0.74(0.07) |
| ML-A2  | 6.9(1.1) | 2.1(0.7) | 17.5(3.5) | 1.30(0.28)    | 26.31(5.61)    | 0.78(0.05) |
| SBP-A2 | 6.6(1.1) | 1.9(0.5) | 17.6(3.7) | 1.38(0.33)    | 26.50(5.89)    | 0.77(0.05) |
| MRF-A1 | 7.0(0.7) | 6.1(1.5) | 13.6(3.1) | 0.76(0.15)    | 2.50(0.77)     | 0.81(0.08) |
| SBS-A3 | 7.7(1.8) | 7.7(2.2) | 15.3(8.8) | 23.76(939.62) | 94.32(4106.00) | 0.81(0.10) |
| SBS-A4 | 7.8(1.5) | 3.8(0.3) | 14.7(1.8) | 1.38(0.03)    | 3.13(0.33)     | 0.79(0.03) |

Table S12: Simulation Scenario 9 with missingness. In each cell, mean (sd) based on 200 replicates.

|        | TP.L     | TP.NL    | FP        | EMSE       | EMISE       | PMSE        |
|--------|----------|----------|-----------|------------|-------------|-------------|
| M1     |          |          |           |            |             |             |
| SBS-A1 | 8.6(1.6) | 8.9(1.4) | 8.6(3.1)  | 0.71(0.21) | 1.14(0.72)  | 4.23(1.24)  |
| CC-A1  | 7.4(1.6) | 7.2(2.3) | 12.8(4.3) | 0.82(0.24) | 1.73(1.12)  | 6.80(2.15)  |
| ML-A2  | 7.0(1.0) | 2.1(0.3) | 14.7(3.5) | 1.45(0.31) | 37.21(6.03) | 12.97(3.62) |
| SBP-A2 | 7.0(1.0) | 2.1(0.3) | 15.2(3.4) | 1.45(0.32) | 37.24(6.12) | 12.91(3.77) |
| MRF-A1 | 8.0(1.4) | 8.0(2.1) | 8.3(3.7)  | 0.75(0.18) | 1.54(1.28)  | 5.49(1.64)  |
| SBS-A3 | 9.3(1.8) | 9.2(1.1) | 18.2(3.9) | 0.74(0.25) | 1.13(0.69)  | 3.90(1.26)  |
| SBS-A4 | 8.4(2.8) | 4.5(1.2) | 15.7(3.0) | 1.16(0.52) | 2.34(1.16)  | 11.84(6.24) |
| M2     |          |          |           |            |             |             |
| SBS-A1 | 8.3(1.4) | 8.6(1.6) | 7.9(3.0)  | 0.73(0.19) | 1.23(0.90)  | 4.55(1.50)  |
| CC-A1  | 5.2(1.7) | 4.9(2.3) | 19.2(4.9) | 0.91(0.21) | 2.66(2.06)  | 14.43(4.85) |
| ML-A2  | 7.2(1.1) | 2.2(0.3) | 14.2(3.2) | 1.45(0.32) | 36.21(6.71) | 12.51(3.83) |
| SBP-A2 | 7.1(1.1) | 2.1(0.4) | 14.5(3.6) | 1.45(0.31) | 35.84(6.48) | 12.77(3.96) |
| MRF-A1 | 7.6(1.2) | 6.5(2.0) | 11.6(3.9) | 0.79(0.18) | 2.23(1.07)  | 6.85(2.01)  |
| SBS-A3 | 8.9(1.8) | 9.0(1.5) | 16.2(3.7) | 0.75(0.24) | 1.26(0.99)  | 4.30(1.54)  |
| SBS-A4 | 8.4(2.8) | 3.9(1.8) | 17.2(5.6) | 1.15(0.48) | 2.50(1.27)  | 11.26(5.62) |
| M3     |          |          |           |            |             |             |
| SBS-A1 | 7.9(1.3) | 8.6(1.4) | 7.2(2.7)  | 0.74(0.17) | 1.35(0.71)  | 4.98(1.47)  |
| CC-A1  | 7.1(1.4) | 6.9(2.3) | 13.9(4.8) | 0.83(0.17) | 1.69(1.13)  | 7.55(2.76)  |
| ML-A2  | 6.9(1.3) | 2.1(0.3) | 13.4(3.1) | 1.45(0.26) | 36.93(7.11) | 13.78(4.37) |
| SBP-A2 | 6.8(1.3) | 2.1(0.3) | 13.3(2.8) | 1.47(0.31) | 36.97(7.45) | 13.85(4.22) |
| MRF-A1 | 7.8(1.2) | 8.1(1.8) | 6.9(3.1)  | 0.75(0.16) | 1.40(0.76)  | 5.65(1.65)  |
| SBS-A3 | 8.3(1.5) | 8.7(1.5) | 14.1(3.5) | 0.78(0.20) | 1.42(0.75)  | 5.31(1.76)  |
| SBS-A4 | 8.4(2.8) | 3.0(1.4) | 12.8(2.2) | 1.16(0.45) | 2.95(2.43)  | 12.00(8.62) |
| M4     |          |          |           |            |             |             |
| SBS-A1 | 7.2(1.0) | 7.4(2.1) | 6.1(2.4)  | 0.79(0.18) | 1.80(0.82)  | 6.34(1.88)  |
| CC-A1  | 4.6(1.4) | 4.0(2.0) | 20.8(5.3) | 0.94(0.29) | 2.86(2.68)  | 14.42(4.35) |
| ML-A2  | 6.8(1.1) | 2.0(0.3) | 12.8(2.9) | 1.51(0.30) | 36.14(6.50) | 14.09(4.83) |
| SBP-A2 | 6.7(1.1) | 1.9(0.3) | 12.9(3.3) | 1.52(0.30) | 36.41(7.05) | 14.36(4.04) |
| MRF-A1 | 7.0(1.1) | 6.3(2.4) | 6.9(3.3)  | 0.81(0.18) | 1.97(0.96)  | 7.69(2.11)  |
| SBS-A3 | 7.6(0.9) | 7.6(2.0) | 12.9(3.2) | 0.82(0.22) | 1.89(0.84)  | 6.57(1.71)  |
| SBS-A4 | 8.4(2.8) | 3.2(1.7) | 9.0(1.5)  | 1.17(0.52) | 3.02(1.10)  | 13.53(9.26) |

Table S13: Simulation Scenario 10 with missingness. In each cell, mean (sd) based on 200 replicates.

|        | TP.L      | TP.NL    | FP        | EMSE       | EMISE         | PMSE          |
|--------|-----------|----------|-----------|------------|---------------|---------------|
| M1     |           |          |           |            |               |               |
| SBS-A1 | 7.6(1.3)  | 7.8(2.0) | 10.9(3.9) | 0.86(0.25) | 1.29(0.69)    | 7.10(2.74)    |
| CC-A1  | 6.2(1.5)  | 5.7(2.6) | 16.2(5.3) | 1.02(0.34) | 1.93(1.21)    | 11.95(5.04)   |
| ML-A2  | 6.3(1.3)  | 1.9(0.1) | 14.5(3.9) | 1.74(0.36) | 36.91(7.04)   | 16.94(3.78)   |
| SBP-A2 | 6.3(1.4)  | 2.0(0.1) | 14.6(3.9) | 1.72(0.36) | 36.62(7.14)   | 17.23(4.16)   |
| MRF-A1 | 7.1(1.3)  | 6.8(2.4) | 9.4(3.5)  | 0.89(0.27) | 1.53(0.70)    | 8.65(3.49)    |
| SBS-A3 | 4.4(2.5)  | 3.9(2.5) | 28.3(9.5) | 3.43(4.47) | 25.54(72.13)  | 61.17(123.88) |
| SBS-A4 | 16.0(3.1) | 3.0(1.1) | 19.4(2.9) | 1.23(0.33) | 3.13(0.80)    | 15.53(2.58)   |
| M2     |           |          |           |            |               |               |
| SBS-A1 | 7.2(1.2)  | 7.5(1.9) | 9.9(3.8)  | 0.87(0.27) | 1.38(0.85)    | 7.91(3.31)    |
| CC-A1  | 4.3(1.2)  | 3.9(1.4) | 22.5(5.1) | 1.13(0.49) | 3.11(1.76)    | 18.61(5.69)   |
| ML-A2  | 6.3(1.4)  | 2.0(0.1) | 15.2(4.3) | 1.71(0.36) | 35.95(7.18)   | 17.35(4.03)   |
| SBP-A2 | 6.3(1.4)  | 2.1(0.1) | 14.4(4.2) | 1.69(0.38) | 36.16(7.16)   | 17.29(4.14)   |
| MRF-A1 | 6.8(1.2)  | 5.1(2.0) | 14.1(5.2) | 0.94(0.29) | 2.17(0.79)    | 10.55(4.01)   |
| SBS-A3 | 4.5(2.5)  | 4.0(2.6) | 26.6(9.3) | 3.45(4.48) | 40.72(159.17) | 59.34(121.66) |
| SBS-A4 | 3.2(1.1)  | 2.8(1.4) | 16.8(5.9) | 1.30(0.24) | 3.01(0.68)    | 17.36(1.78)   |
| M3     |           |          |           |            |               |               |
| SBS-A1 | 7.1(1.1)  | 6.9(1.9) | 8.7(3.5)  | 0.90(0.28) | 1.47(0.67)    | 8.04(3.00)    |
| CC-A1  | 5.9(1.3)  | 5.9(2.3) | 16.6(4.1) | 1.01(0.32) | 1.79(0.84)    | 12.31(5.59)   |
| ML-A2  | 6.3(1.4)  | 1.8(0.1) | 13.5(3.6) | 1.73(0.43) | 37.12(6.77)   | 17.38(3.99)   |
| SBP-A2 | 6.1(1.5)  | 1.8(0.1) | 13.3(3.6) | 1.74(0.44) | 37.05(7.16)   | 17.82(4.20)   |
| MRF-A1 | 6.8(1.1)  | 6.8(2.0) | 9.0(3.5)  | 0.92(0.27) | 1.53(0.71)    | 8.72(3.43)    |
| SBS-A3 | 4.3(2.4)  | 3.7(2.4) | 20.9(7.8) | 3.00(3.21) | 20.49(54.38)  | 49.78(90.77)  |
| SBS-A4 | 3.2(1.1)  | 2.5(1.9) | 14.1(2.0) | 1.32(0.28) | 3.27(1.19)    | 18.51(2.47)   |
| M4     |           |          |           |            |               |               |
| SBS-A1 | 6.6(1.2)  | 6.2(2.0) | 7.2(3.2)  | 0.96(0.33) | 1.85(0.85)    | 9.96(3.20)    |
| CC-A1  | 4.1(1.2)  | 3.8(1.7) | 21.1(6.2) | 1.10(0.35) | 2.50(1.03)    | 19.18(7.13)   |
| ML-A2  | 5.9(1.3)  | 1.7(0.1) | 12.3(3.0) | 1.76(0.42) | 35.96(8.27)   | 17.77(4.20)   |
| SBP-A2 | 5.8(1.3)  | 1.7(0.1) | 12.9(3.5) | 1.81(0.44) | 36.33(8.70)   | 18.72(4.37)   |
| MRF-A1 | 6.3(1.3)  | 5.1(2.0) | 8.0(3.1)  | 0.98(0.31) | 2.01(0.85)    | 11.36(3.31)   |
| SBS-A3 | 4.2(2.3)  | 3.4(2.1) | 19.5(7.8) | 3.91(5.94) | 18.23(44.97)  | 49.87(97.81)  |
| SBS-A4 | 3.2(1.1)  | 2.0(0.7) | 11.8(2.2) | 1.32(0.26) | 3.39(0.88)    | 23.85(4.11)   |



Table S14: Simulation Scenario 11 with missingness. In each cell, mean (sd) based on 200 replicates.

|        | TP.L      | TP.NL    | FP         | EMSE          | EMISE         | PMSE           |
|--------|-----------|----------|------------|---------------|---------------|----------------|
| M1     |           |          |            |               |               |                |
| SBS-A1 | 8.2(1.5)  | 8.7(1.7) | 8.8(3.1)   | 0.77(0.23)    | 1.22(0.73)    | 5.72(2.27)     |
| CC-A1  | 6.9(1.6)  | 6.7(1.6) | 13.2(4.4)  | 0.88(0.31)    | 1.86(1.03)    | 9.51(4.09)     |
| ML-A2  | 6.7(1.1)  | 2.0(0.2) | 13.1(3.0)  | 1.62(0.34)    | 36.39(7.00)   | 14.52(4.43)    |
| SBP-A2 | 6.7(1.2)  | 2.0(0.2) | 13.3(3.2)  | 1.60(0.34)    | 36.47(7.09)   | 14.60(4.62)    |
| MRF-A1 | 7.9(1.3)  | 7.9(1.8) | 8.3(3.7)   | 0.79(0.22)    | 1.54(0.86)    | 6.79(2.12)     |
| SBS-A3 | 3.4(2.8)  | 3.1(2.7) | 29.2(10.0) | 17.84(77.69)  | 64.26(192.44) | 101.64(180.16) |
| SBS-A4 | 30.4(5.0) | 4.7(1.3) | 15.9(4.5)  | 1.20(0.27)    | 2.19(0.16)    | 12.15(7.37)    |
| M2     |           |          |            |               |               |                |
| SBS-A1 | 7.9(1.5)  | 8.4(1.6) | 8.5(2.9)   | 0.77(0.22)    | 1.31(0.85)    | 6.13(2.52)     |
| CC-A1  | 5.0(1.7)  | 4.7(1.5) | 18.7(4.9)  | 0.94(0.34)    | 3.73(8.71)    | 18.21(8.26)    |
| ML-A2  | 6.7(1.2)  | 2.0(0.2) | 12.6(2.8)  | 1.61(0.39)    | 35.37(7.55)   | 14.31(4.27)    |
| SBP-A2 | 6.8(1.3)  | 2.0(0.2) | 13.1(3.0)  | 1.62(0.39)    | 35.19(7.66)   | 14.40(4.27)    |
| MRF-A1 | 7.6(1.2)  | 6.2(1.5) | 11.2(4.0)  | 0.82(0.25)    | 2.22(0.99)    | 8.37(3.17)     |
| SBS-A3 | 3.4(2.8)  | 3.1(2.7) | 28.2(10.6) | 17.74(75.49)  | 61.31(190.36) | 97.56(188.71)  |
| SBS-A4 | 38.0(7.0) | 4.9(0.9) | 17.3(6.6)  | 1.23(0.34)    | 1.92(0.14)    | 15.70(10.74)   |
| M3     |           |          |            |               |               |                |
| SBS-A1 | 7.8(1.0)  | 8.4(1.4) | 7.3(2.2)   | 0.77(0.19)    | 1.40(0.65)    | 6.26(1.93)     |
| CC-A1  | 7.0(1.4)  | 7.1(1.8) | 13.6(5.0)  | 0.88(0.26)    | 1.90(1.45)    | 9.18(3.52)     |
| ML-A2  | 6.7(1.3)  | 2.0(0.2) | 11.9(3.0)  | 1.55(0.33)    | 35.93(8.18)   | 15.34(4.20)    |
| SBP-A2 | 6.6(1.3)  | 1.9(0.2) | 11.6(2.9)  | 1.58(0.36)    | 36.29(8.58)   | 15.32(4.84)    |
| MRF-A1 | 7.6(1.1)  | 7.7(1.7) | 6.9(2.5)   | 0.79(0.20)    | 1.48(0.77)    | 7.11(2.65)     |
| SBS-A3 | 3.3(2.8)  | 3.0(2.4) | 21.5(9.1)  | 23.76(175.99) | 30.77(63.03)  | 90.58(196.46)  |
| SBS-A4 | 30.4(5.0) | 4.3(0.8) | 12.7(2.9)  | 1.20(0.30)    | 2.50(0.38)    | 15.12(7.71)    |
| M4     |           |          |            |               |               |                |
| SBS-A1 | 7.4(1.0)  | 7.4(1.5) | 6.2(2.0)   | 0.82(0.25)    | 1.81(0.77)    | 7.61(2.08)     |
| CC-A1  | 4.4(1.6)  | 4.2(1.6) | 18.8(4.6)  | 0.97(0.29)    | 3.11(2.72)    | 18.02(7.54)    |
| ML-A2  | 6.4(1.2)  | 1.7(0.2) | 11.7(2.9)  | 1.65(0.37)    | 34.95(7.79)   | 15.89(4.82)    |
| SBP-A2 | 6.4(1.2)  | 1.8(0.2) | 11.0(2.7)  | 1.67(0.39)    | 35.02(8.57)   | 16.93(5.83)    |
| MRF-A1 | 7.2(1.1)  | 6.0(1.5) | 6.6(2.6)   | 0.84(0.25)    | 1.92(0.82)    | 9.24(2.84)     |
| SBS-A3 | 3.2(2.7)  | 2.8(2.5) | 21.3(10.3) | 51.50(544.98) | 26.85(46.94)  | 137.35(535.10) |
| SBS-A4 | 30.4(5.0) | 3.1(1.0) | 11.1(2.2)  | 1.20(0.30)    | 2.70(0.21)    | 18.64(7.59)    |

Table S15: Simulation Scenario 12 with missingness. In each cell, mean (sd) based on 200 replicates.

|        | TP.L      | TP.NL    | FP         | EMSE       | EMISE       | PMSE         |
|--------|-----------|----------|------------|------------|-------------|--------------|
| M1     |           |          |            |            |             |              |
| SBS-A1 | 8.8(1.7)  | 8.5(1.6) | 9.1(3.0)   | 0.73(0.22) | 1.15(0.65)  | 5.52(2.16)   |
| CC-A1  | 7.4(1.6)  | 6.5(2.7) | 14.8(3.8)  | 0.85(0.23) | 1.72(1.06)  | 9.43(4.13)   |
| ML-A2  | 7.0(1.2)  | 2.0(0.2) | 13.1(2.9)  | 1.49(0.27) | 37.99(7.30) | 13.90(4.36)  |
| SBP-A2 | 7.1(1.1)  | 2.1(0.2) | 13.5(3.0)  | 1.50(0.27) | 37.92(7.20) | 14.24(4.80)  |
| MRF-A1 | 8.4(1.3)  | 7.8(2.3) | 8.8(3.4)   | 0.76(0.22) | 1.46(0.91)  | 6.63(2.80)   |
| SBS-A3 | 8.0(3.0)  | 7.8(2.6) | 22.7(8.6)  | 1.09(0.58) | 2.82(4.01)  | 9.46(11.98)  |
| SBS-A4 | 20.4(6.8) | 3.8(0.6) | 18.1(4.3)  | 1.28(0.49) | 2.61(1.06)  | 14.88(6.60)  |
| M2     |           |          |            |            |             |              |
| SBS-A1 | 8.5(1.6)  | 8.3(1.8) | 8.0(2.6)   | 0.74(0.20) | 1.15(0.53)  | 5.88(2.17)   |
| CC-A1  | 5.4(1.9)  | 4.6(2.5) | 19.2(4.8)  | 0.95(0.39) | 2.60(1.89)  | 16.88(7.28)  |
| ML-A2  | 7.1(1.1)  | 2.0(0.2) | 13.2(3.2)  | 1.49(0.26) | 36.52(7.33) | 14.49(5.43)  |
| SBP-A2 | 7.0(1.1)  | 2.0(0.2) | 13.0(3.3)  | 1.49(0.26) | 36.83(7.22) | 14.03(4.96)  |
| MRF-A1 | 8.1(1.6)  | 5.8(2.7) | 12.3(3.8)  | 0.80(0.27) | 2.18(1.16)  | 8.45(3.41)   |
| SBS-A3 | 7.8(3.2)  | 7.7(2.6) | 21.2(11.3) | 1.10(0.58) | 2.63(3.43)  | 10.02(12.95) |
| SBS-A4 | 8.5(3.1)  | 3.5(1.6) | 16.4(2.5)  | 1.36(0.29) | 2.80(1.96)  | 16.63(8.20)  |
| M3     |           |          |            |            |             |              |
| SBS-A1 | 8.3(1.7)  | 7.8(2.1) | 7.1(2.6)   | 0.76(0.25) | 1.37(0.60)  | 6.72(2.53)   |
| CC-A1  | 7.1(1.6)  | 6.4(2.7) | 13.6(4.2)  | 0.86(0.25) | 1.75(1.08)  | 9.57(3.32)   |
| ML-A2  | 6.9(1.1)  | 2.0(0.2) | 12.2(3.0)  | 1.47(0.26) | 37.63(7.30) | 14.34(5.04)  |
| SBP-A2 | 6.9(1.0)  | 2.0(0.2) | 11.8(2.6)  | 1.48(0.26) | 38.19(7.66) | 14.70(5.34)  |
| MRF-A1 | 8.1(1.6)  | 7.3(2.4) | 7.1(2.2)   | 0.77(0.22) | 1.43(0.80)  | 7.15(2.82)   |
| SBS-A3 | 7.4(2.8)  | 7.3(2.7) | 17.0(7.3)  | 1.09(0.43) | 2.54(3.19)  | 8.55(6.63)   |
| SBS-A4 | 17.0(4.2) | 3.0(2.0) | 13.2(3.4)  | 1.30(0.16) | 2.89(1.55)  | 18.01(4.45)  |
| M4     |           |          |            |            |             |              |
| SBS-A1 | 7.7(1.2)  | 6.8(2.4) | 6.7(2.0)   | 0.81(0.25) | 1.73(0.80)  | 8.15(2.89)   |
| CC-A1  | 5.3(1.8)  | 4.2(2.5) | 20.9(4.6)  | 0.95(0.33) | 2.61(1.95)  | 15.92(5.44)  |
| ML-A2  | 6.8(1.2)  | 1.8(0.2) | 12.1(3.3)  | 1.55(0.28) | 36.72(8.23) | 14.16(4.14)  |
| SBP-A2 | 6.7(1.1)  | 1.8(0.2) | 11.0(3.0)  | 1.56(0.28) | 37.12(8.12) | 14.73(4.84)  |
| MRF-A1 | 7.4(1.5)  | 5.8(2.5) | 7.4(2.0)   | 0.83(0.25) | 2.02(1.08)  | 9.94(3.49)   |
| SBS-A3 | 7.0(2.5)  | 6.4(2.4) | 15.3(6.4)  | 1.12(0.53) | 2.93(3.50)  | 10.12(8.34)  |
| SBS-A4 | 13.6(5.3) | 2.4(1.3) | 11.5(3.1)  | 1.31(0.52) | 3.89(2.90)  | 26.92(8.79)  |

Table S16: Simulation Scenario 13 with missingness. In each cell, mean (sd) based on 200 replicates.

|        | TP.L     | TP.NL    | FP        | EMSE       | EMISE       | PMSE       |
|--------|----------|----------|-----------|------------|-------------|------------|
| M1     |          |          |           |            |             |            |
| SBS-A1 | 8.5(1.2) | 9.5(1.1) | 8.1(2.7)  | 0.71(0.16) | 1.40(0.57)  | 0.89(0.02) |
| CC-A1  | 7.1(1.3) | 7.3(1.5) | 8.7(3.5)  | 0.78(0.19) | 1.91(1.02)  | 0.84(0.01) |
| ML-A2  | 7.0(1.3) | 2.5(0.5) | 13.3(3.2) | 1.13(0.24) | 26.89(4.47) | 0.82(0.04) |
| SBP-A2 | 7.0(1.2) | 2.5(0.5) | 13.6(3.2) | 1.14(0.25) | 27.01(4.61) | 0.83(0.05) |
| MRF-A1 | 7.7(0.7) | 8.5(1.4) | 9.1(2.8)  | 0.75(0.15) | 1.67(0.59)  | 0.86(0.03) |
| SBS-A3 | 8.9(1.6) | 9.4(1.0) | 15.2(4.5) | 0.68(0.24) | 1.33(0.58)  | 0.89(0.04) |
| SBS-A4 | 9.8(3.0) | 3.7(2.3) | 23.8(4.4) | 1.18(0.27) | 1.82(0.26)  | 0.85(0.03) |
| M2     |          |          |           |            |             |            |
| SBS-A1 | 8.1(0.9) | 9.2(1.1) | 8.2(2.6)  | 0.73(0.15) | 1.41(0.48)  | 0.87(0.03) |
| CC-A1  | 4.2(1.3) | 3.9(1.3) | 8.7(2.7)  | 0.94(0.27) | 3.04(1.12)  | 0.75(0.02) |
| ML-A2  | 6.9(1.3) | 2.3(0.5) | 13.4(3.5) | 1.15(0.27) | 25.88(4.55) | 0.80(0.05) |
| SBP-A2 | 6.8(1.3) | 2.3(0.6) | 13.3(3.1) | 1.16(0.27) | 26.04(4.61) | 0.80(0.05) |
| MRF-A1 | 7.5(0.6) | 6.2(1.7) | 11.5(3.0) | 0.78(0.15) | 2.41(0.56)  | 0.85(0.03) |
| SBS-A3 | 8.7(1.4) | 9.4(1.0) | 14.6(4.4) | 0.69(0.22) | 1.29(0.41)  | 0.88(0.04) |
| SBS-A4 | 9.8(3.0) | 3.3(1.9) | 23.1(2.0) | 1.19(0.27) | 1.91(0.32)  | 0.84(0.03) |
| M3     |          |          |           |            |             |            |
| SBS-A1 | 7.8(0.8) | 8.7(1.1) | 7.7(3.0)  | 0.73(0.13) | 1.67(0.55)  | 0.86(0.03) |
| CC-A1  | 7.2(1.2) | 7.3(1.7) | 8.6(3.2)  | 0.79(0.20) | 1.99(1.10)  | 0.84(0.02) |
| ML-A2  | 6.7(1.3) | 2.2(0.5) | 13.4(3.2) | 1.16(0.25) | 27.74(5.05) | 0.79(0.06) |
| SBP-A2 | 6.7(1.3) | 2.2(0.6) | 13.2(3.0) | 1.18(0.28) | 27.84(4.96) | 0.79(0.06) |
| MRF-A1 | 7.7(0.8) | 8.3(1.2) | 7.8(2.7)  | 0.75(0.15) | 1.76(0.54)  | 0.85(0.03) |
| SBS-A3 | 8.7(1.4) | 9.3(1.0) | 12.1(4.0) | 0.71(0.23) | 1.55(0.53)  | 0.88(0.04) |
| SBS-A4 | 6.6(2.3) | 3.7(2.3) | 17.7(7.9) | 1.22(0.24) | 2.04(0.31)  | 0.84(0.03) |
| M4     |          |          |           |            |             |            |
| SBS-A1 | 7.4(0.7) | 7.7(1.4) | 11.6(3.4) | 0.76(0.16) | 2.09(0.50)  | 0.84(0.03) |
| CC-A1  | 3.6(1.2) | 3.5(0.9) | 8.7(2.8)  | 0.93(0.26) | 3.07(0.95)  | 0.73(0.02) |
| ML-A2  | 6.7(1.3) | 2.2(0.7) | 17.2(3.4) | 1.22(0.28) | 26.68(5.23) | 0.78(0.06) |
| SBP-A2 | 6.6(1.4) | 2.0(0.7) | 16.5(3.6) | 1.24(0.28) | 26.84(5.58) | 0.78(0.06) |
| MRF-A1 | 7.1(0.7) | 6.8(1.4) | 13.3(3.2) | 0.79(0.14) | 2.42(0.47)  | 0.83(0.03) |
| SBS-A3 | 8.1(1.2) | 8.7(1.3) | 10.3(3.7) | 0.74(0.23) | 1.82(0.50)  | 0.86(0.04) |
| SBS-A4 | 4.1(1.4) | 3.3(1.6) | 13.6(3.5) | 1.26(0.16) | 2.29(0.40)  | 0.83(0.02) |

Table S17: Simulation Scenario 14 with missingness. In each cell, mean (sd) based on 200 replicates.

|        | TP.L     | TP.NL    | FP        | EMSE        | EMISE         | PMSE       |
|--------|----------|----------|-----------|-------------|---------------|------------|
| M1     |          |          |           |             |               |            |
| SBS-A1 | 8.0(0.9) | 8.3(1.6) | 8.7(3.5)  | 0.77(0.16)  | 1.66(0.53)    | 0.84(0.05) |
| CC-A1  | 6.4(1.5) | 6.1(2.2) | 8.9(3.8)  | 0.86(0.24)  | 2.26(0.73)    | 0.79(0.11) |
| ML-A2  | 7.2(1.2) | 2.5(0.5) | 12.7(3.3) | 1.26(0.23)  | 25.53(5.42)   | 0.77(0.07) |
| SBP-A2 | 7.1(1.3) | 2.4(0.5) | 12.4(3.7) | 1.27(0.23)  | 25.51(5.42)   | 0.78(0.07) |
| MRF-A1 | 7.5(0.7) | 7.3(1.7) | 8.8(3.3)  | 0.79(0.15)  | 1.90(0.55)    | 0.83(0.05) |
| SBS-A3 | 5.5(3.1) | 5.5(3.2) | 20.7(9.0) | 5.54(41.09) | 31.76(299.24) | 0.71(0.14) |
| SBS-A4 | 5.6(1.6) | 4.0(0.2) | 25.6(0.8) | 1.43(0.33)  | 1.99(0.24)    | 0.78(0.03) |
| M2     |          |          |           |             |               |            |
| SBS-A1 | 7.8(0.8) | 8.2(1.5) | 8.6(3.5)  | 0.78(0.16)  | 1.68(0.41)    | 0.84(0.05) |
| CC-A1  | 3.5(1.4) | 3.3(1.5) | 9.0(3.8)  | 1.03(0.24)  | 3.31(1.02)    | 0.72(0.11) |
| ML-A2  | 7.1(1.1) | 2.4(0.5) | 13.1(3.8) | 1.26(0.22)  | 24.31(5.38)   | 0.77(0.05) |
| SBP-A2 | 7.0(1.2) | 2.4(0.5) | 12.3(3.7) | 1.26(0.23)  | 24.67(5.30)   | 0.77(0.07) |
| MRF-A1 | 7.2(0.9) | 5.3(2.1) | 11.6(3.9) | 0.84(0.18)  | 2.66(0.54)    | 0.81(0.07) |
| SBS-A3 | 5.4(3.0) | 5.3(2.9) | 19.0(8.2) | 5.52(41.83) | 40.20(516.42) | 0.71(0.14) |
| SBS-A4 | 3.5(1.9) | 4.3(0.3) | 24.4(3.1) | 1.45(0.38)  | 2.06(0.26)    | 0.78(0.03) |
| M3     |          |          |           |             |               |            |
| SBS-A1 | 7.5(0.7) | 7.6(1.8) | 8.0(3.3)  | 0.78(0.14)  | 1.92(0.50)    | 0.83(0.05) |
| CC-A1  | 6.4(1.5) | 6.0(2.0) | 8.7(3.7)  | 0.90(0.24)  | 2.71(2.55)    | 0.79(0.11) |
| ML-A2  | 7.0(1.1) | 2.4(0.5) | 11.7(3.1) | 1.26(0.23)  | 26.50(5.49)   | 0.77(0.07) |
| SBP-A2 | 6.7(1.1) | 2.3(0.5) | 12.0(3.4) | 1.28(0.22)  | 26.55(5.98)   | 0.77(0.07) |
| MRF-A1 | 7.3(0.8) | 6.8(1.7) | 7.5(2.7)  | 0.79(0.14)  | 1.99(0.54)    | 0.82(0.05) |
| SBS-A3 | 5.4(3.0) | 5.3(2.9) | 17.5(7.8) | 5.12(43.06) | 28.44(251.09) | 0.71(0.14) |
| SBS-A4 | 3.5(1.9) | 3.9(0.0) | 18.2(3.1) | 1.46(0.35)  | 2.14(0.25)    | 0.78(0.03) |
| M4     |          |          |           |             |               |            |
| SBS-A1 | 6.8(0.9) | 6.3(1.6) | 7.6(2.6)  | 0.80(0.15)  | 2.33(0.47)    | 0.81(0.05) |
| CC-A1  | 3.0(1.2) | 2.7(1.2) | 8.5(3.5)  | 1.04(0.34)  | 3.67(1.36)    | 0.71(0.11) |
| ML-A2  | 6.5(1.2) | 2.1(0.5) | 11.7(3.0) | 1.32(0.25)  | 25.53(6.49)   | 0.76(0.05) |
| SBP-A2 | 6.2(1.3) | 1.9(0.5) | 11.3(3.6) | 1.34(0.25)  | 25.78(7.03)   | 0.75(0.07) |
| MRF-A1 | 6.5(0.9) | 5.2(1.5) | 7.8(3.3)  | 0.82(0.17)  | 2.52(0.49)    | 0.80(0.05) |
| SBS-A3 | 5.2(2.9) | 4.8(2.7) | 15.9(6.4) | 5.00(33.71) | 29.41(277.44) | 0.71(0.12) |
| SBS-A4 | 3.5(1.9) | 3.7(0.2) | 16.4(1.7) | 1.43(0.44)  | 2.32(0.27)    | 0.77(0.03) |

Table S18: Simulation Scenario 15 with missingness. In each cell, mean (sd) based on 200 replicates.

|        | TP.L     | TP.NL    | FP        | EMSE       | EMISE       | PMSE       |
|--------|----------|----------|-----------|------------|-------------|------------|
| M1     |          |          |           |            |             |            |
| SBS-A1 | 8.6(1.3) | 9.3(0.9) | 7.5(3.1)  | 0.68(0.20) | 1.28(0.69)  | 0.87(0.05) |
| CC-A1  | 7.1(1.6) | 7.1(1.4) | 7.6(3.0)  | 0.78(0.27) | 1.85(1.14)  | 0.83(0.07) |
| ML-A2  | 7.1(1.2) | 2.5(0.5) | 12.2(2.7) | 1.17(0.20) | 28.30(4.66) | 0.78(0.08) |
| SBP-A2 | 7.1(1.3) | 2.5(0.5) | 12.1(2.9) | 1.18(0.21) | 28.31(4.68) | 0.78(0.08) |
| MRF-A1 | 8.1(0.9) | 8.4(1.2) | 8.6(3.6)  | 0.72(0.20) | 1.60(0.79)  | 0.86(0.05) |
| SBS-A3 | 8.3(1.1) | 8.8(1.0) | 13.4(4.5) | 0.74(0.24) | 1.27(0.56)  | 0.85(0.07) |
| SBS-A4 | 5.5(4.0) | 4.1(1.1) | 22.1(1.2) | 1.31(0.28) | 1.96(1.05)  | 0.82(0.02) |
| M2     |          |          |           |            |             |            |
| SBS-A1 | 8.3(1.1) | 9.3(1.0) | 7.2(2.9)  | 0.69(0.18) | 1.32(0.71)  | 0.87(0.04) |
| CC-A1  | 4.0(1.3) | 4.0(1.0) | 8.5(2.9)  | 0.93(0.30) | 3.26(2.30)  | 0.74(0.06) |
| ML-A2  | 7.1(1.2) | 2.5(0.5) | 12.7(3.4) | 1.18(0.20) | 26.91(5.18) | 0.78(0.08) |
| SBP-A2 | 7.0(1.2) | 2.6(0.5) | 12.3(2.8) | 1.18(0.19) | 26.77(5.21) | 0.78(0.08) |
| MRF-A1 | 7.7(0.8) | 6.1(1.2) | 11.3(3.0) | 0.75(0.18) | 2.43(0.85)  | 0.84(0.05) |
| SBS-A3 | 8.2(1.1) | 8.7(1.1) | 13.1(3.8) | 0.74(0.23) | 1.32(0.64)  | 0.85(0.05) |
| SBS-A4 | 4.8(4.8) | 4.4(1.4) | 22.4(1.3) | 1.33(0.28) | 2.16(0.76)  | 0.83(0.01) |
| M3     |          |          |           |            |             |            |
| SBS-A1 | 8.2(1.2) | 8.5(1.1) | 7.0(3.0)  | 0.69(0.18) | 1.58(0.70)  | 0.86(0.05) |
| CC-A1  | 6.9(1.3) | 6.6(1.6) | 8.6(3.4)  | 0.79(0.24) | 1.90(1.24)  | 0.82(0.07) |
| ML-A2  | 6.9(1.4) | 2.3(0.5) | 12.0(2.6) | 1.20(0.22) | 28.44(4.86) | 0.78(0.08) |
| SBP-A2 | 6.8(1.3) | 2.3(0.4) | 11.6(2.7) | 1.22(0.23) | 28.81(4.95) | 0.77(0.08) |
| MRF-A1 | 7.8(0.9) | 8.1(1.2) | 7.5(3.0)  | 0.72(0.18) | 1.68(0.76)  | 0.85(0.05) |
| SBS-A3 | 8.0(1.3) | 8.5(1.1) | 12.3(4.7) | 0.75(0.24) | 1.48(0.68)  | 0.85(0.05) |
| SBS-A4 | 0.0(0.0) | 3.5(1.4) | 17.0(1.0) | 1.41(0.12) | 2.60(1.11)  | 0.82(0.02) |
| M4     |          |          |           |            |             |            |
| SBS-A1 | 7.5(0.9) | 7.4(1.2) | 11.3(3.8) | 0.74(0.23) | 2.08(0.90)  | 0.83(0.06) |
| CC-A1  | 4.3(1.6) | 3.9(1.1) | 7.9(3.0)  | 0.90(0.36) | 3.17(2.01)  | 0.75(0.07) |
| ML-A2  | 6.7(1.4) | 2.1(0.5) | 15.6(2.9) | 1.28(0.22) | 27.36(5.51) | 0.76(0.08) |
| SBP-A2 | 6.6(1.3) | 2.1(0.4) | 15.4(2.7) | 1.30(0.22) | 27.99(5.45) | 0.76(0.10) |
| MRF-A1 | 7.3(0.9) | 6.5(1.1) | 12.1(3.7) | 0.76(0.21) | 2.30(0.84)  | 0.82(0.06) |
| SBS-A3 | 7.8(1.0) | 8.1(1.1) | 10.8(3.6) | 0.77(0.22) | 1.85(0.64)  | 0.84(0.07) |
| SBS-A4 | 0.0(0.0) | 3.9(1.9) | 16.3(1.6) | 1.40(0.05) | 2.62(0.90)  | 0.81(0.02) |

Table S19: Simulation Scenario 16 with missingness. In each cell, mean (sd) based on 200 replicates.

|        | TP.L     | TP.NL    | FP        | EMSE       | EMISE       | PMSE       |
|--------|----------|----------|-----------|------------|-------------|------------|
| M1     |          |          |           |            |             |            |
| SBS-A1 | 8.1(1.0) | 8.9(1.3) | 8.9(3.8)  | 0.73(0.14) | 1.59(0.77)  | 0.86(0.05) |
| CC-A1  | 6.7(1.2) | 6.4(2.0) | 9.3(3.7)  | 0.83(0.21) | 2.16(1.04)  | 0.82(0.06) |
| ML-A2  | 7.3(1.0) | 2.4(0.6) | 13.2(3.7) | 1.16(0.20) | 27.54(6.12) | 0.79(0.02) |
| SBP-A2 | 7.2(1.1) | 2.2(0.6) | 13.1(3.1) | 1.16(0.20) | 27.69(6.01) | 0.79(0.02) |
| MRF-A1 | 7.6(0.9) | 7.9(1.8) | 9.5(4.2)  | 0.76(0.14) | 1.98(0.85)  | 0.85(0.04) |
| SBS-A3 | 7.7(2.7) | 7.7(2.5) | 17.0(6.4) | 0.99(0.32) | 7.53(60.60) | 0.84(0.08) |
| SBS-A4 | 5.2(2.3) | 4.4(0.4) | 19.2(1.8) | 1.40(0.04) | 2.21(0.27)  | 0.84(0.01) |
| M2     |          |          |           |            |             |            |
| SBS-A1 | 7.8(0.9) | 8.8(1.6) | 8.2(3.9)  | 0.74(0.16) | 1.59(0.81)  | 0.86(0.04) |
| CC-A1  | 3.7(1.6) | 3.4(1.4) | 9.8(4.1)  | 0.96(0.27) | 3.94(2.35)  | 0.73(0.06) |
| ML-A2  | 7.1(0.9) | 2.2(0.6) | 12.6(3.4) | 1.17(0.19) | 26.03(6.16) | 0.79(0.02) |
| SBP-A2 | 7.1(0.8) | 2.3(0.6) | 12.5(3.4) | 1.16(0.20) | 26.25(6.00) | 0.79(0.02) |
| MRF-A1 | 7.4(0.7) | 5.8(1.9) | 12.4(4.2) | 0.79(0.14) | 2.83(0.87)  | 0.83(0.04) |
| SBS-A3 | 7.7(2.7) | 7.6(2.5) | 16.5(6.0) | 0.98(0.30) | 7.51(60.66) | 0.84(0.09) |
| SBS-A4 | 4.5(2.7) | 4.5(0.5) | 16.5(3.8) | 1.38(0.04) | 2.30(0.21)  | 0.84(0.02) |
| M3     |          |          |           |            |             |            |
| SBS-A1 | 7.6(0.7) | 8.2(1.6) | 8.4(3.0)  | 0.75(0.14) | 1.85(0.68)  | 0.85(0.04) |
| CC-A1  | 6.7(1.0) | 6.4(2.0) | 10.1(4.1) | 0.83(0.23) | 2.33(1.16)  | 0.82(0.05) |
| ML-A2  | 6.9(1.1) | 2.1(0.5) | 12.7(2.8) | 1.17(0.20) | 28.01(6.03) | 0.78(0.03) |
| SBP-A2 | 6.9(0.9) | 2.0(0.6) | 12.8(3.5) | 1.18(0.20) | 28.38(6.20) | 0.78(0.04) |
| MRF-A1 | 7.4(0.8) | 7.5(1.7) | 8.3(3.8)  | 0.76(0.14) | 2.04(0.77)  | 0.84(0.04) |
| SBS-A3 | 7.7(2.7) | 7.7(2.7) | 13.8(5.5) | 0.98(0.30) | 7.73(60.38) | 0.83(0.10) |
| SBS-A4 | 5.2(2.3) | 4.6(0.5) | 14.5(2.3) | 1.40(0.03) | 2.38(0.31)  | 0.84(0.02) |
| M4     |          |          |           |            |             |            |
| SBS-A1 | 7.3(0.8) | 7.1(1.5) | 12.7(4.9) | 0.78(0.13) | 2.41(0.67)  | 0.82(0.05) |
| CC-A1  | 4.2(1.5) | 3.5(1.5) | 9.2(3.7)  | 0.96(0.28) | 3.68(2.45)  | 0.73(0.07) |
| ML-A2  | 6.7(0.9) | 2.0(0.5) | 16.2(4.5) | 1.23(0.21) | 26.86(6.30) | 0.77(0.03) |
| SBP-A2 | 6.5(1.0) | 1.9(0.7) | 16.8(4.0) | 1.25(0.20) | 27.44(6.45) | 0.76(0.03) |
| MRF-A1 | 7.0(0.9) | 6.3(1.9) | 13.5(4.8) | 0.81(0.14) | 2.64(0.84)  | 0.81(0.04) |
| SBS-A3 | 7.4(2.6) | 7.0(2.4) | 12.6(5.2) | 1.01(0.29) | 8.41(60.05) | 0.82(0.09) |
| SBS-A4 | 4.5(2.7) | 4.5(0.5) | 14.0(3.3) | 1.38(0.04) | 3.03(0.26)  | 0.83(0.04) |

### **Data analysis: recoding of E variables**

The following variable recoding is conducted to facilitate analysis by reducing cells with very small counts.

**STAD** [1] AJCC metastasis pathologic stage is coded as 0 for M0, 1 for M1, and 2 for MX; [2] AJCC nodes pathologic stage is coded as 0 for N0, 1 for N1-N3, and 2 for NX; [3] AJCC tumor pathologic stage is coded as 0 for T1 and T2, 1 for T3 and T4, and 2 for TX; [4] Gender is coded as 0 for female, and 1 for male; [5] ICD O3 histology is coded as 0 for 814, and 1 for others; [6] ICD O3 site is coded as 0 for C16.0, 1 for C16.1, 2 for C16.2, 3 for C16.3, and 4 for C16.9; [7] History of other malignancy is coded as 0 for Yes, and 1 for NO.

**SKCM** [1] Clark level is coded as 0 for I-III, and 1 for IV and V; [2] AJCC metastasis pathologic stage is coded as 0 for M0, and 1 for M1; [3] AJCC nodes pathologic stage is coded as 0 for N0, 1 for N1-N3, and 2 for NX; [4] AJCC tumor pathologic stage is coded as 0 for T1 and T2, 1 for T3 and T4, and 2 for TX and Tis; [5] Gender is coded as 0 for female, and 1 for male; [6] Sample type is coded as 0 for metastatic and additional metastatic, and 1 for primary tumor.

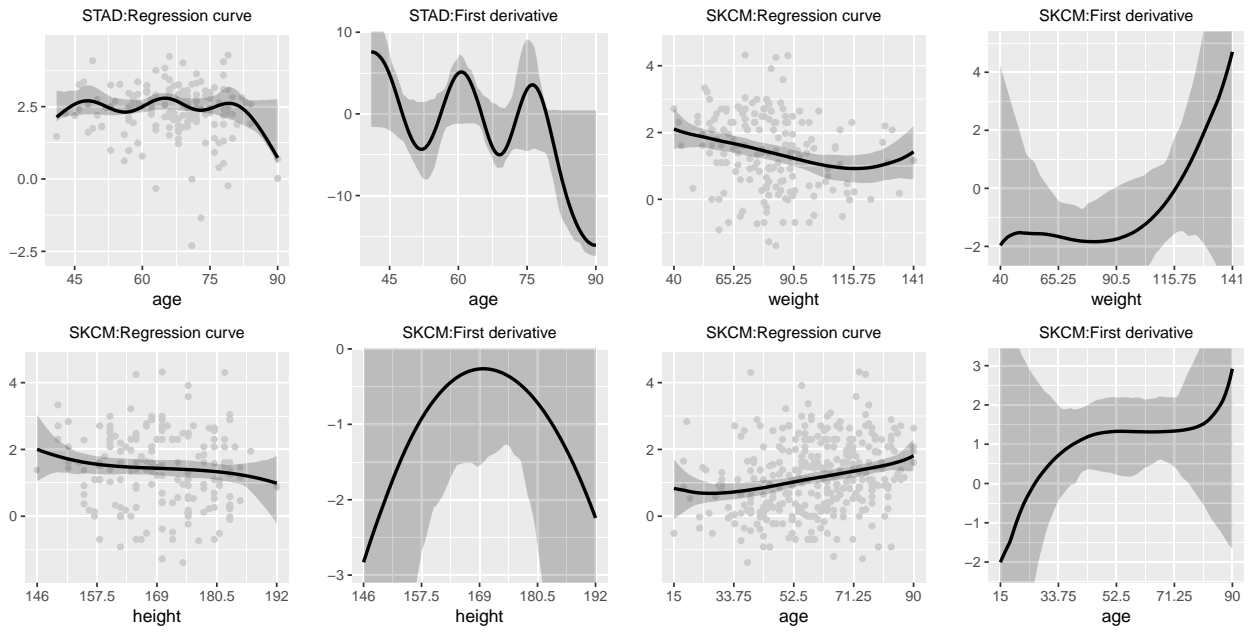

Figure S4: Data analysis. Regression curves and first order derivatives with wild bootstrap-based 95% confidence intervals (shaded area) for age of STAD data, and weight, height, and age of SKCM data.



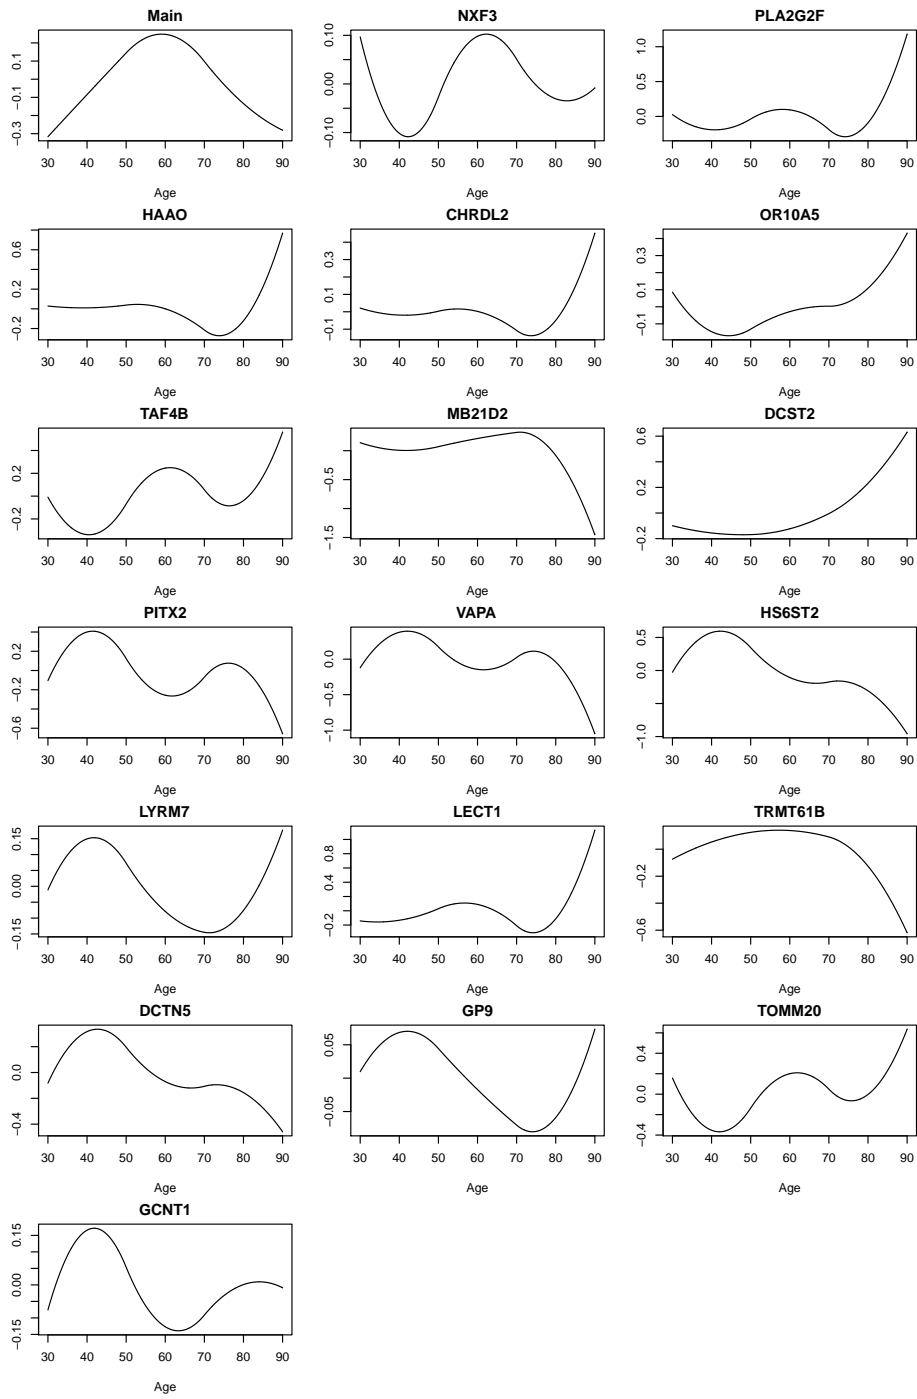

Figure S5: Analysis of STAD data: estimated nonlinear effects of age using the proposed approach.

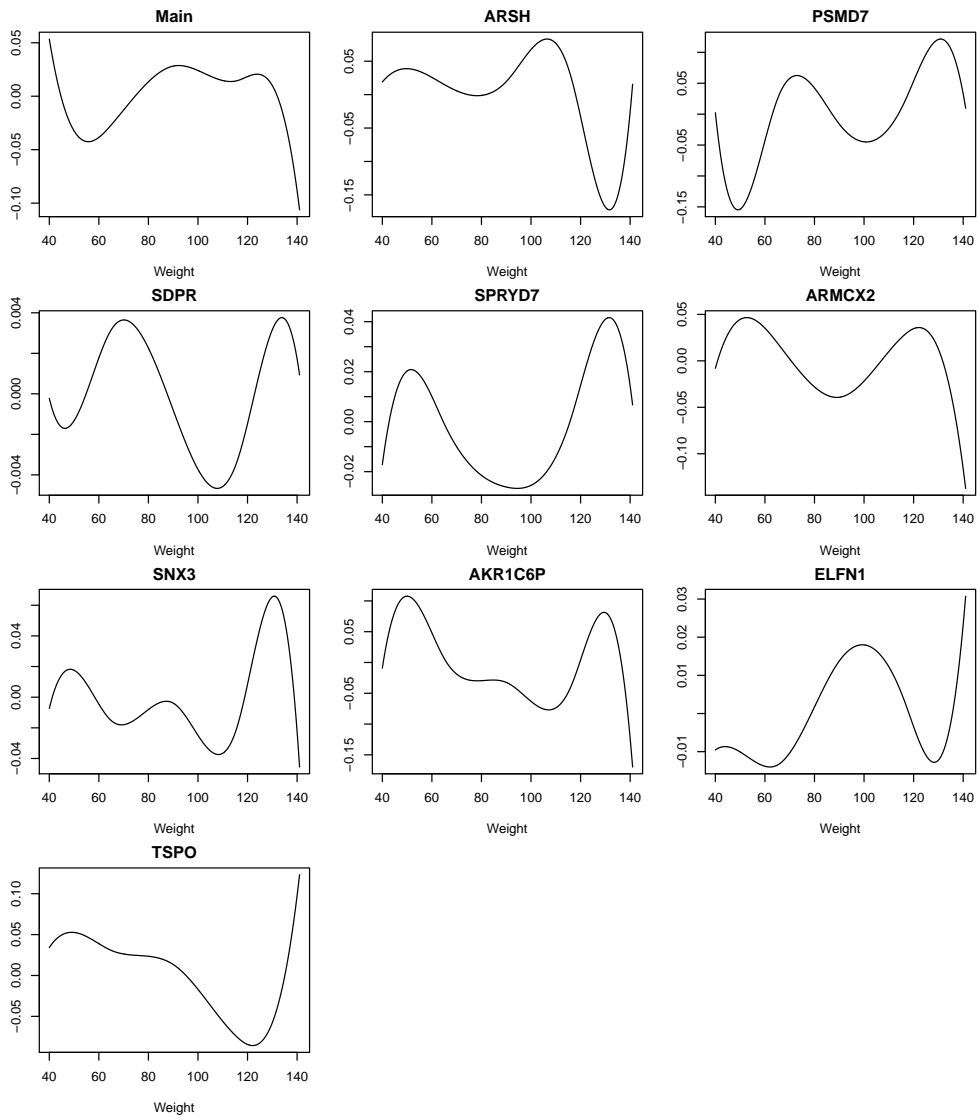

Figure S6: Analysis of SKCM data: estimated nonlinear effects of weight using the proposed approach.

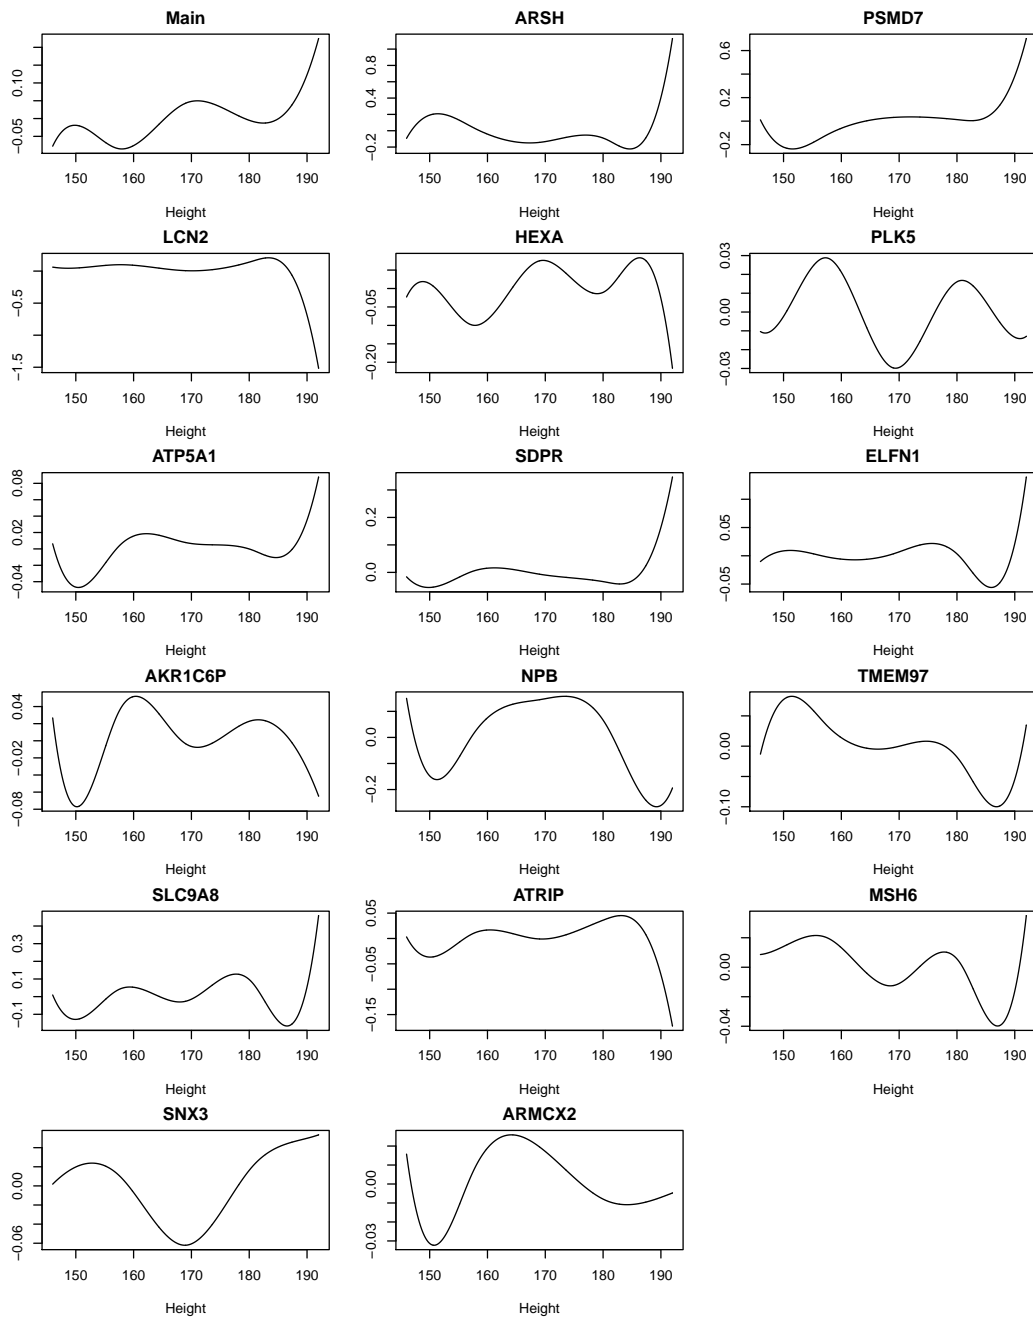

Figure S7: Analysis of SKCM data: estimated nonlinear effects of height using the proposed approach.

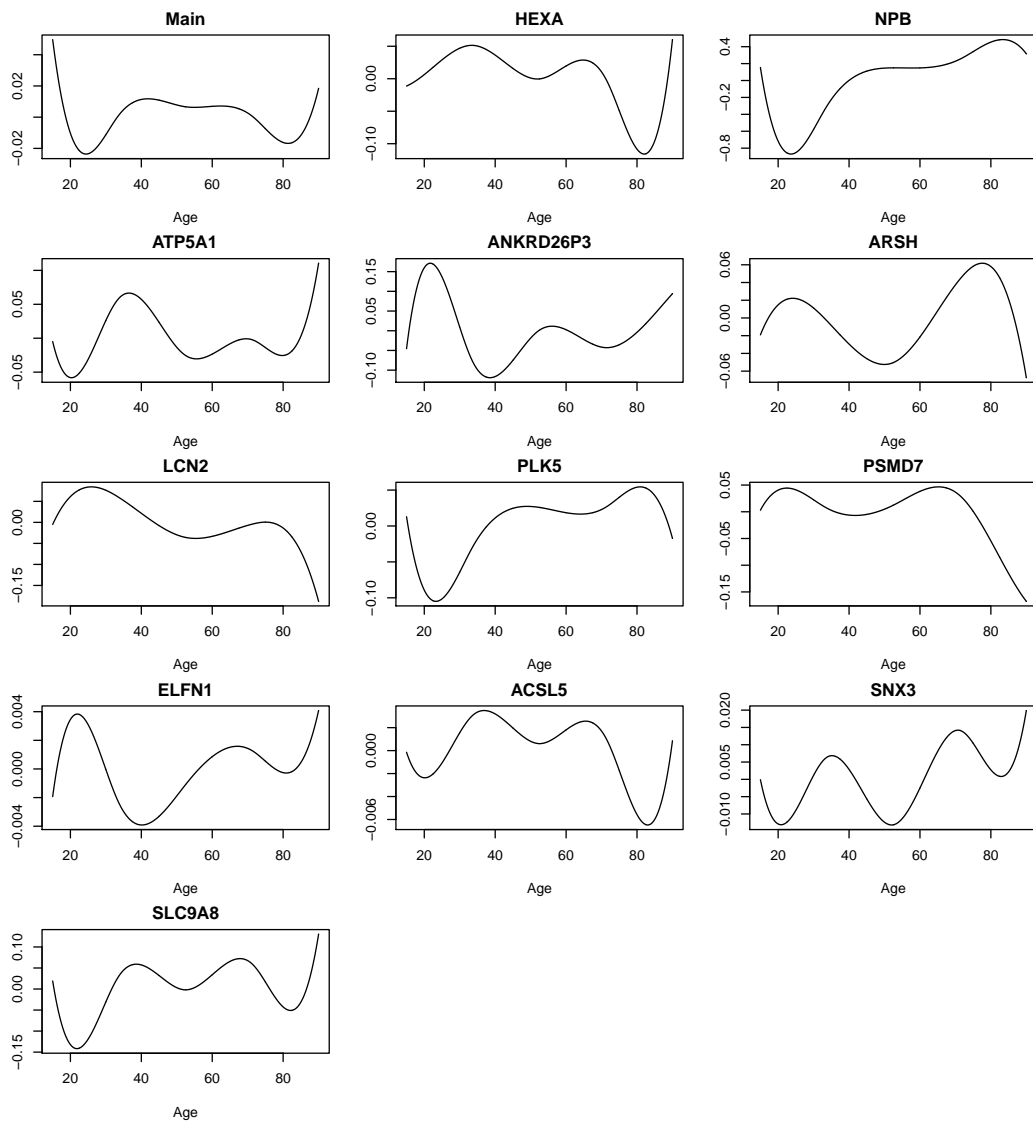

Figure S8: Analysis of SKCM data: estimated nonlinear effects of age using the proposed approach.

Table S20: Analysis of STAD data: number of overlapping interactions (RV-coefficient) identified by different approaches.

|             |    | A1        | A2        | A3        | A4        | A5        |
|-------------|----|-----------|-----------|-----------|-----------|-----------|
| Main E      | A1 | 3 (1.00)  | 1 (0.90)  | 2 (0.94)  | 0 (0.00)  | 0 (0.79)  |
|             | A2 |           | 1 (1.00)  | 1 (0.94)  | 0 (0.00)  | 0 (0.75)  |
|             | A3 |           |           | 3 (1.00)  | 0 (0.00)  | 0 (0.77)  |
|             | A4 |           |           |           | 0 (1.00)  | 0 (0.00)  |
|             | A5 |           |           |           |           | 1 (1.00)  |
| Main G      | A1 | 45 (1.00) | 33 (0.83) | 18 (0.54) | 10 (0.52) | 0 (0.06)  |
|             | A2 |           | 40 (1.00) | 18 (0.54) | 10 (0.53) | 0 (0.07)  |
|             | A3 |           |           | 91 (1.00) | 7 (0.37)  | 1 (0.13)  |
|             | A4 |           |           |           | 33 (1.00) | 0 (0.03)  |
|             | A5 |           |           |           |           | 2 (1.00)  |
| Interaction | A1 | 24 (1.00) | 1 (0.22)  | 4 (0.47)  | 0 (0.05)  | 0 (0.19)  |
|             | A2 |           | 1 (1.00)  | 2 (0.04)  | 0 (0.00)  | 0 (0.03)  |
|             | A3 |           |           | 42 (1.00) | 0 (0.05)  | 0 (0.22)  |
|             | A4 |           |           |           | 1 (1.00)  | 0 (0.01)  |
|             | A5 |           |           |           |           | 40 (1.00) |

Table S21: Analysis of SKCM data: number of overlapping interactions (RV-coefficient) identified by different approaches.

|             |        | SBS-A1    | CC-A1      | ML-A2     | SBP-A2    | MRF-A1    | SBS-A3     | SBS-A4    |
|-------------|--------|-----------|------------|-----------|-----------|-----------|------------|-----------|
| Main E      | SBS-A1 | 7 (1.00)  | 6 (1.00)   | 4 (0.81)  | 5 (0.97)  | 7 (1.00)  | 7 (1.00)   | 0 (0.00)  |
|             | CC-A1  |           | 6 (1.00)   | 3 (0.81)  | 4 (0.97)  | 6 (1.00)  | 6 (1.00)   | 0 (0.00)  |
|             | ML-A2  |           |            | 5 (1.00)  | 4 (0.82)  | 4 (0.81)  | 4 (0.81)   | 0 (0.00)  |
|             | SBP-A2 |           |            |           | 5 (1.00)  | 5 (0.97)  | 5 (0.97)   | 0 (0.00)  |
|             | MRF-A1 |           |            |           |           | 7 (1.00)  | 7 (1.00)   | 0 (0.00)  |
|             | SBS-A3 |           |            |           |           |           | 7 (1.00)   | 0 (0.00)  |
|             | SBS-A4 |           |            |           |           |           |            | 0 (1.00)  |
| Main G      | SBS-A1 | 35 (1.00) | 8 (0.54)   | 18 (0.69) | 22 (0.87) | 18 (0.74) | 13 (0.55)  | 0 (0.00)  |
|             | CC-A1  |           | 53 (1.00)  | 8 (0.63)  | 5 (0.56)  | 7 (0.44)  | 6 (0.54)   | 0 (0.00)  |
|             | ML-A2  |           |            | 31 (1.00) | 19 (0.72) | 17(0.53)  | 14 (0.48)  | 0 (0.00)  |
|             | SBP-A2 |           |            |           | 33 (1.00) | 22 (0.83) | 18 ( 0.69) | 0 (0.00)  |
|             | MRF-A1 |           |            |           |           | 30 (1.00) | 15 (0.65)  | 0 (0.00)  |
|             | SBS-A3 |           |            |           |           |           | 40 (1.00)  | 0 (0.00)  |
|             | SBS-A4 |           |            |           |           |           |            | 0 (1.00)  |
| Interaction | SBS-A1 | 43 (1.00) | 10 (0.79)  | 4 (0.51)  | 3 (0.46)  | 19 (0.76) | 16 (0.69)  | 0 (0.54)  |
|             | CC-A1  |           | 109 (1.00) | 2 (0.37)  | 2 (0.34)  | 3 (0.65)  | 7 (0.69)   | 1 (0.59)  |
|             | ML-A2  |           |            | 5 (1.00)  | 3 (0.71)  | 4 (0.56)  | 1 (0.35)   | 0 (0.21)  |
|             | SBP-A2 |           |            |           | 9 (1.00)  | 5 (0.48)  | 4 (0.38)   | 0 (0.22)  |
|             | MRF-A1 |           |            |           |           | 33 (1.00) | 16 (0.69)  | 0 (0.38)  |
|             | SBS-A3 |           |            |           |           |           | 67 (1.00)  | 0 (0.38)  |
|             | SBS-A4 |           |            |           |           |           |            | 48 (1.00) |
